# Supplementary material for: Non-Penicillin-Susceptible Streptococcus suis Isolated from Humans
Source: MDPI journal article supplement (doi:10.3390/pathogens10091178), 2021-09-13
Supplement: s1 [file s1]

## Alignment of pbp2A sequence

|             |                                                                                                                                                                                                                                              |     |
|-------------|----------------------------------------------------------------------------------------------------------------------------------------------------------------------------------------------------------------------------------------------|-----|
| pbp2a_32098 | MDDLQHQP <span style="color: blue;">IE</span> VPEDFQID <span style="color: red;">HED</span> <span style="color: blue;">R</span> PSRR <span style="color: red;">R</span> RGNRGS <span style="color: red;">V</span> DKPKKKSRIPEPIRKFWRRYQLTKIL | 60  |
| pbp2a_33329 | MDDLQHQP <span style="color: blue;">IE</span> VPEDFQID <span style="color: red;">HED</span> <span style="color: blue;">R</span> PSRR <span style="color: red;">R</span> RGNRGS <span style="color: red;">V</span> DKPKKKSRIPEPIRKFWRRYQLTKIL | 60  |
| pbp2a_22715 | MDDLQHQP <span style="color: blue;">IE</span> VPEDFQID <span style="color: red;">NED</span> <span style="color: blue;">Q</span> PSRR <span style="color: red;">R</span> RGNRGS <span style="color: red;">V</span> DKPKKKSRIPEPIRKFWRRYQLTKIL | 60  |
| pbp2a_37647 | MDDLQHQP <span style="color: blue;">IE</span> VPEDFQID <span style="color: red;">NED</span> <span style="color: blue;">Q</span> PSRR <span style="color: red;">R</span> RGNRGS <span style="color: red;">V</span> DKPKKKSRIPEPIRKFWRRYQLTKIL | 60  |
| pbp2a_40085 | MDDLQHQP <span style="color: blue;">IE</span> VPEDFQID <span style="color: red;">NED</span> <span style="color: blue;">Q</span> PSRR <span style="color: red;">R</span> RGNRGS <span style="color: red;">V</span> DKPKKKSRIPEPIRKFWRRYQLTKIL | 60  |
| pbp2a_40484 | MDDLQHQP <span style="color: blue;">IE</span> VPEDFQID <span style="color: red;">NED</span> <span style="color: blue;">Q</span> PSRR <span style="color: red;">R</span> RGNRGS <span style="color: red;">V</span> DKPKKKSRIPEPIRKFWRRYQLTKIL | 60  |
| pbp2a_40747 | MDDLQHQP <span style="color: blue;">IE</span> VPEDFQID <span style="color: red;">NED</span> <span style="color: blue;">Q</span> PSRR <span style="color: red;">R</span> RGNRGS <span style="color: red;">V</span> DKPKKKSRIPEPIRKFWRRYQLTKIL | 60  |
| pbp2a_41126 | MDDLQHQP <span style="color: blue;">IE</span> VPEDFQID <span style="color: red;">NED</span> <span style="color: blue;">Q</span> PSRR <span style="color: red;">R</span> RGNRGS <span style="color: red;">V</span> DKPKKKSRIPEPIRKFWRRYQLTKIL | 60  |
| pbp2A_P1/7  | MDDLQHQP <span style="color: blue;">IE</span> VPEDFQID <span style="color: red;">HED</span> <span style="color: blue;">R</span> PSRR <span style="color: red;">H</span> RGNRGS <span style="color: red;">I</span> DKPKKKSRIPEPIRKFWRRYQLTKIL | 60  |
| pbp2a_32494 | MDDLQHQP <span style="color: blue;">IE</span> VPEDFQID <span style="color: red;">HED</span> <span style="color: blue;">R</span> PSRR <span style="color: red;">H</span> RGNRGS <span style="color: red;">I</span> DKPKKKSRIPEPIRKFWRRYQLTKIL | 60  |
| pbp2a_30190 | MDDLQHQP <span style="color: blue;">IE</span> VPEDFQID <span style="color: red;">HED</span> <span style="color: blue;">R</span> PSRR <span style="color: red;">R</span> RGNRGS <span style="color: red;">I</span> DKPKKKSRIPEPIRKFWRRYQLTKIL | 60  |
|             | *****:*.:.*****:*****:*****:*****                                                                                                                                                                                                            |     |
|             |                                                                                                                                                                                                                                              |     |
| pbp2a_32098 | IILMVLTVLTVGGYLFFLAKTANVGDLQQALKATTIIYDKDGAEAGTSLGQKGT <span style="color: red;">Y</span> VELDA                                                                                                                                              | 120 |
| pbp2a_33329 | IILMVLTVLTVGGYLFFLAKTANVGDLQQALKATTIIYDKDGAEAGTSLGQKGT <span style="color: red;">Y</span> VELDA                                                                                                                                              | 120 |
| pbp2a_22715 | IILMVLTVLTVGGYLFFLAKTANVGDLQQALKATTIIYDKDGAEAGTSLGQKGT <span style="color: red;">Y</span> VELDA                                                                                                                                              | 120 |
| pbp2a_37647 | IILMVLTVLTVGGYLFFLAKTANVGDLQQALKATTIIYDKDGAEAGTSLGQKGT <span style="color: red;">Y</span> VELDA                                                                                                                                              | 120 |
| pbp2a_40085 | IILMVLTVLTVGGYLFFLAKTANVGDLQQALKATTIIYDKDGAEAGTSLGQKGT <span style="color: red;">Y</span> VELDA                                                                                                                                              | 120 |
| pbp2a_40484 | IILMVLTVLTVGGYLFFLAKTANVGDLQQALKATTIIYDKDGAEAGTSLGQKGT <span style="color: red;">Y</span> VELDA                                                                                                                                              | 120 |
| pbp2a_40747 | IILMVLTVLTVGGYLFFLAKTANVGDLQQALKATTIIYDKDGAEAGTSLGQKGT <span style="color: red;">Y</span> VELDA                                                                                                                                              | 120 |
| pbp2a_41126 | IILMVLTVLTVGGYLFFLAKTANVGDLQQALKATTIIYDKDGAEAGTSLGQKGT <span style="color: red;">Y</span> VELDA                                                                                                                                              | 120 |
| pbp2A_P1/7  | IILMVLTVLTVGGYLFFLAKTANVGDLQQALKATTIIYDKDGAEAGTSLGQKGT <span style="color: red;">Y</span> VELDA                                                                                                                                              | 120 |
| pbp2a_32494 | IILMVLTVLTVGGYLFFLAKTANVGDLQQALKATTIIYDKDGAEAGTSLGQKGT <span style="color: red;">Y</span> VELDA                                                                                                                                              | 120 |
| pbp2a_30190 | IILMVLTVLTVGGYLFFLAKTANVGDLQQALKATTIIYDKDGAEAGTSLGQKGT <span style="color: red;">Y</span> VELDA                                                                                                                                              | 120 |
|             | *****:*****:*****:*****:*****:*****                                                                                                                                                                                                          |     |
|             |                                                                                                                                                                                                                                              |     |
| pbp2a_32098 | <span style="color: red;">V</span> SDNLENAVIATEDRSFYKNSGINYQRTILAALT <span style="color: red;">L</span> GRSGGGSTITQQLAKNAFLTQDQTI                                                                                                            | 180 |
| pbp2a_33329 | <span style="color: red;">V</span> SDNLENAVIATEDRSFYKNSGINYQRTILAALT <span style="color: red;">L</span> GRSGGGSTITQQLAKNAFLTQDQTI                                                                                                            | 180 |
| pbp2a_22715 | <span style="color: red;">V</span> SDNLENAVIATEDRSFYKNSGINYQRTILAALT <span style="color: red;">L</span> GRSGGGSTITQQLAKNAFLTQDQTI                                                                                                            | 180 |
| pbp2a_37647 | <span style="color: red;">V</span> SDNLENAVIATEDRSFYKNSGINYQRTILAALT <span style="color: red;">L</span> GRSGGGSTITQQLAKNAFLTQDQTI                                                                                                            | 180 |
| pbp2a_40085 | <span style="color: red;">V</span> SDNLENAVIATEDRSFYKNSGINYQRTILAALT <span style="color: red;">L</span> GRSGGGSTITQQLAKNAFLTQDQTI                                                                                                            | 180 |
| pbp2a_40484 | <span style="color: red;">V</span> SDNLENAVIATEDRSFYKNSGINYQRTILAALT <span style="color: red;">L</span> GRSGGGSTITQQLAKNAFLTQDQTI                                                                                                            | 180 |
| pbp2a_40747 | <span style="color: red;">V</span> SDNLENAVIATEDRSFYKNSGINYQRTILAALT <span style="color: red;">L</span> GRSGGGSTITQQLAKNAFLTQDQTI                                                                                                            | 180 |
| pbp2a_41126 | <span style="color: red;">V</span> SDNLENAVIATEDRSFYKNSGINYQRTILAALT <span style="color: red;">L</span> GRSGGGSTITQQLAKNAFLTQDQTI                                                                                                            | 180 |
| pbp2A_P1/7  | <span style="color: blue;">I</span> SDNLENAVIATEDRSFYKNSGINYQRTILAALT <span style="color: red;">L</span> GRSGGGSTITQQLAKNAFLTQDQTI                                                                                                           | 180 |
| pbp2a_32494 | <span style="color: blue;">I</span> SDNLENAVIATEDRSFYKNSGINYQRTILAALT <span style="color: red;">L</span> GRSGGGSTITQQLAKNAFLTQDQTI                                                                                                           | 180 |
| pbp2a_30190 | <span style="color: red;">V</span> SDNLENAVIATEDRSFYKNSGINYQRTILAALT <span style="color: red;">L</span> GRSGGGSTITQQLAKNAFLTQDQTI                                                                                                            | 180 |
|             | :*****:*****:*****:*****:*****:*****                                                                                                                                                                                                         |     |
|             |                                                                                                                                                                                                                                              |     |
| pbp2a_32098 | SRKAREFFLALEINKKY <span style="color: red;">S</span> KQEILTMYLNNAYFGNGVWGVEDASQKYFGIPAS <span style="color: red;">D</span> LTLEQAA                                                                                                           | 240 |
| pbp2a_33329 | SRKAREFFLALEINKKY <span style="color: red;">S</span> KQEILTMYLNNAYFGNGVWGVEDASQKYFGIPAS <span style="color: red;">D</span> LTLEQAA                                                                                                           | 240 |
| pbp2a_22715 | SRKAREFFLALEINKKY <span style="color: red;">S</span> KQEILTMYLNNAYFGNGVWGVEDASQKYFGIPAS <span style="color: red;">D</span> LTLEQAA                                                                                                           | 240 |
| pbp2a_37647 | SRKAREFFLALEINKKY <span style="color: red;">S</span> KQEILTMYLNNAYFGNGVWGVEDASQKYFGIPAS <span style="color: red;">D</span> LTLEQAA                                                                                                           | 240 |
| pbp2a_40085 | SRKAREFFLALEINKKY <span style="color: red;">S</span> KQEILTMYLNNAYFGNGVWGVEDASQKYFGIPAS <span style="color: red;">D</span> LTLEQAA                                                                                                           | 240 |
| pbp2a_40484 | SRKAREFFLALEINKKY <span style="color: red;">S</span> KQEILTMYLNNAYFGNGVWGVEDASQKYFGIPAS <span style="color: red;">D</span> LTLEQAA                                                                                                           | 240 |
| pbp2a_40747 | SRKAREFFLALEINKKY <span style="color: red;">S</span> KQEILTMYLNNAYFGNGVWGVEDASQKYFGIPAS <span style="color: red;">D</span> LTLEQAA                                                                                                           | 240 |
| pbp2a_41126 | SRKAREFFLALEINKKY <span style="color: red;">S</span> KQEILTMYLNNAYFGNGVWGVEDASQKYFGIPAS <span style="color: red;">D</span> LTLEQAA                                                                                                           | 240 |
| pbp2A_P1/7  | SRKAREFFLALEINKKY <span style="color: red;">S</span> KQEILTMYLNNAYFGNGVWGVEDASQKYFGIPAS <span style="color: blue;">N</span> LTLEQAA                                                                                                          | 240 |
| pbp2a_32494 | SRKAREFFLALEINKKY <span style="color: red;">S</span> KQEILTMYLNNAYFGNGVWGVEDASQKYFGIPAS <span style="color: red;">D</span> LTLEQAA                                                                                                           | 240 |
| pbp2a_30190 | SRKAREFFLALEINKKY <span style="color: red;">S</span> KQEILTMYLNNAYFGNGVWGVEDASQKYFGIPAS <span style="color: blue;">N</span> LTLEQAA                                                                                                          | 240 |
|             | *****:*****:*****:*****:*****:*****                                                                                                                                                                                                          |     |
|             |                                                                                                                                                                                                                                              |     |
| pbp2a_32098 | VIAGMLKGPEIYNPYYSLEN <span style="color: red;">A</span> VNRRD <span style="color: red;">T</span> VLQNMVN <span style="color: blue;">A</span> GYIDQATADAGFQVDLASQLSDTYT                                                                       | 300 |
| pbp2a_33329 | VIAGMLKGPEIYNPYYSLEN <span style="color: red;">A</span> VNRRD <span style="color: red;">T</span> VLQNMVN <span style="color: blue;">A</span> GYIDQATADAGFQVDLASQLSDTYT                                                                       | 300 |
| pbp2a_22715 | VIAGMLKGPEIYNPYYSLEN <span style="color: red;">A</span> VNRRD <span style="color: red;">T</span> VLQNMVN <span style="color: blue;">A</span> GYIDQATADAGFQVDLASQLSDTYT                                                                       | 300 |
| pbp2a_37647 | VIAGMLKGPEIYNPYYSLEN <span style="color: red;">A</span> VNRRD <span style="color: red;">T</span> VLQNMVN <span style="color: blue;">A</span> GYIDQATADAGFQVDLASQLSDTYT                                                                       | 300 |
| pbp2a_40085 | VIAGMLKGPEIYNPYYSLEN <span style="color: red;">A</span> VNRRD <span style="color: red;">T</span> VLQNMVN <span style="color: blue;">A</span> GYIDQATADAGFQVDLASQLSDTYT                                                                       | 300 |
| pbp2a_40484 | VIAGMLKGPEIYNPYYSLEN <span style="color: red;">A</span> VNRRD <span style="color: red;">T</span> VLQNMVN <span style="color: blue;">A</span> GYIDQATADAGFQVDLASQLSDTYT                                                                       | 300 |
| pbp2a_40747 | VIAGMLKGPEIYNPYYSLEN <span style="color: red;">A</span> VNRRD <span style="color: red;">T</span> VLQNMVN <span style="color: blue;">A</span> GYIDQATADAGFQVDLASQLSDTYT                                                                       | 300 |
| pbp2a_41126 | VIAGMLKGPEIYNPYYSLEN <span style="color: red;">A</span> VNRRD <span style="color: red;">T</span> VLQNMVN <span style="color: blue;">A</span> GYIDQATADAGFQVDLASQLSDTYT                                                                       | 300 |
| pbp2A_P1/7  | VIAGMLKGPEIYNPYYSLEN <span style="color: red;">A</span> VNRRD <span style="color: red;">T</span> VLQNMVN <span style="color: blue;">A</span> GYIDQATADAGFQVDLASQLSDTYT                                                                       | 300 |
| pbp2a_32494 | VIAGMLKGPEIYNPYYSLEN <span style="color: red;">A</span> VNRRD <span style="color: red;">T</span> VLQNMVN <span style="color: blue;">A</span> GYIDQATADAGFQVDLASQLSDTYT                                                                       | 300 |
| pbp2a_30190 | VIAGMLKGPEIYNPYYSLEN <span style="color: red;">A</span> VNRRD <span style="color: red;">T</span> VLQNMVN <span style="color: red;">T</span> GYIDQATADAGFQVDLASQLSDTYT                                                                        | 300 |
|             | *****:*****:*****:*****:*****:*****                                                                                                                                                                                                          |     |

|             |                                           |                     |     |
|-------------|-------------------------------------------|---------------------|-----|
| pbp2a_32098 | GKQSNYSYPSYFDAVIAEAIERYGLKESDIINNGYRIYTEM | DQNSQASMQVIFNDETMFP | 360 |
| pbp2a_33329 | GKQSNYSYPSYFDAVIAEAIERYGLKESDIINNGYRIYTEM | DQNSQASMQVIFNDETMFP | 360 |
| pbp2a_22715 | GKQSNYSYPSYFDAVIAEAIERYGLKESDIINNGYRIYTEM | DQNSQASMQVIFNDETMFP | 360 |
| pbp2a_37647 | GKQSNYSYPSYFDAVIAEAIERYGLKESDIINNGYRIYTEM | DQNSQASMQVIFNDETMFP | 360 |
| pbp2a_40085 | GKQSNYSYPSYFDAVIAEAIERYGLKESDIINNGYRIYTEM | DQNSQASMQVIFNDETMFP | 360 |
| pbp2a_40484 | GKQSNYSYPSYFDAVIAEAIERYGLKESDIINNGYRIYTEM | DQNSQASMQVIFNDETMFP | 360 |
| pbp2a_40747 | GKQSNYSYPSYFDAVIAEAIERYGLKESDIINNGYRIYTEM | DQNSQASMQVIFNDETMFP | 360 |
| pbp2a_41126 | GKQSNYSYPSYFDAVIAEAIERYGLKESDIINNGYRIYTEM | DQNSQASMQVIFNDETMFP | 360 |
| pbp2A_P1/7  | GKQSNYSYPSYFDAVIAEAIERYGLKESDIINNGYRIYTEM | DQNSQASMQVIFNDETMFP | 360 |
| pbp2a_32494 | GKQSNYSYPSYFDAVIAEAIERYGLKESDIINNGYRIYTEM | DQNSQASMQVIFNDETMFP | 360 |
| pbp2a_30190 | GKQSNYSYPSYFDAVIAEAIERYGLKESDIINNGYRIYTEM | DQNSQASMQVIFNDETMFP | 360 |

\*\*\*\*\*

|             |                                           |                    |     |
|-------------|-------------------------------------------|--------------------|-----|
| pbp2a_32098 | TSSFDGTHAQAAASVALDPTGGVRLVGRVNSSEDAVFRTFN | FATQAKRSPGSTIKPLVA | 420 |
| pbp2a_33329 | TSSFDGTHAQAAASVALDPTGGVRLVGRVNSSEDAVFRTFN | FATQAKRSPGSTIKPLVA | 420 |
| pbp2a_22715 | TSSFDGTHAQAAASVALDPTGGVRLVGRVNSSEDAVFRTFN | FATQAKRSPGSTIKPLVA | 420 |
| pbp2a_37647 | TSSFDGTHAQAAASVALDPTGGVRLVGRVNSSEDAVFRTFN | FATQAKRSPGSTIKPLVA | 420 |
| pbp2a_40085 | TSSFDGTHAQAAASVALDPTGGVRLVGRVNSSEDAVFRTFN | FATQAKRSPGSTIKPLVA | 420 |
| pbp2a_40484 | TSSFDGTHAQAAASVALDPTGGVRLVGRVNSSEDAVFRTFN | FATQAKRSPGSTIKPLVA | 420 |
| pbp2a_40747 | TSSFDGTHAQAAASVALDPTGGVRLVGRVNSSEDAVFRTFN | FATQAKRSPGSTIKPLVA | 420 |
| pbp2a_41126 | TSSFDGTHAQAAASVALDPTGGVRLVGRVNSSEDAVFRTFN | FATQAKRSPGSTIKPLVA | 420 |
| pbp2A_P1/7  | TSSFDGTHAQAAASVALDPTGGVRLVGRVNSSEDAVFRTFN | FATQAKRSPGSTIKPLVA | 420 |
| pbp2a_32494 | TSSFDGTHAQAAASVALDPTGGVRLVGRVNSSEDAVFRTFN | FATQAKRSPGSTIKPLVA | 420 |
| pbp2a_30190 | TSSFDGTHAQAAASVALDPTGGVRLVGRVNSSEDAVFRTFN | FATQAKRSPGSTIKPLVA | 420 |

\*\*\*\*\*:\*\*\*\*\*

|             |                         |                          |               |     |
|-------------|-------------------------|--------------------------|---------------|-----|
| pbp2a_32098 | YAPAVAAGWAIDTGLDNHTETYG | DYTLHNYDYSTSDTIPMYQALALS | YNLPVAYIVNTFG | 480 |
| pbp2a_33329 | YAPAVAAGWAIDTGLDNHTETYG | DYTLHNYDYSTSDTIPMYQALALS | YNLPVAYIVNTFG | 480 |
| pbp2a_22715 | YAPAVAAGWSIDMSLDNHTETYG | DYTLHNYDYSTSDTIPMYQALALS | YNLPVAYIVNTLG | 480 |
| pbp2a_37647 | YAPAVAAGWSIDMSLDNHTETYG | DYTLHNYDYSTSDTIPMYQALALS | YNLPVAYIVNTLG | 480 |
| pbp2a_40085 | YAPAVAAGWSIDMSLDNHTETYG | DYTLHNYDYSTSDTIPMYQALALS | YNLPVAYIVNTLG | 480 |
| pbp2a_40484 | YAPAVAAGWSIDMSLDNHTETYG | DYTLHNYDYSTSDTIPMYQALALS | YNLPVAYIVNTLG | 480 |
| pbp2a_40747 | YAPAVAAGWSIDMSLDNHTETYG | DYTLHNYDYSTSDTIPMYQALALS | YNLPVAYIVNTLG | 480 |
| pbp2a_41126 | YAPAVAAGWSIDMSLDNHTETYG | DYTLHNYDYSTSDTIPMYQALALS | YNLPVAYIVNTLG | 480 |
| pbp2A_P1/7  | YAPAVAAGWSIDMALDNHTETYG | DYTLHNYDYSTSDTIPMYQALALS | YNLPVAYIVNTLG | 480 |
| pbp2a_32494 | YAPAVAAGWSIDMALDNHTETYG | DYTLHNYDYSTSDTIPMYQALALS | YNLPVAYIVNTLG | 480 |
| pbp2a_30190 | YAPAVAAGWSIDMALDNHTETYG | DYTLHNYDYSTSDTIPMYQALALS | YNLPVAYIVNTLG | 480 |

\*\*\*\*\*:\*\*\* \*\*\*\*\*:\*

|             |                                           |                     |     |
|-------------|-------------------------------------------|---------------------|-----|
| pbp2a_32098 | IDKAFEFGQKFGLDMENVEKVLGASIGSGVETNPLQMAQAY | SAFANDGVMKDAHLITRIE | 540 |
| pbp2a_33329 | IDKAFEFGQKFGLDMENVEKVLGASIGSGVETNPLQMAQAY | SAFANDGVMKDAHLITRIE | 540 |
| pbp2a_22715 | IDKAFEYGQKFGLDMENVEKVLGVSIGSGVETNPLQMAQAY | ATFANKGVMKDAHLITRIE | 540 |
| pbp2a_37647 | IDKAFEYGQKFGLDMENVEKVLGVSIGSGVETNPLQMAQAY | ATFANKGVMKDAHLITRIE | 540 |
| pbp2a_40085 | IDKAFEYGQKFGLDMENVEKVLGVSIGSGVETNPLQMAQAY | ATFANKGVMKDAHLITRIE | 540 |
| pbp2a_40484 | IDKAFEYGQKFGLDMENVEKVLGVSIGSGVETNPLQMAQAY | ATFANKGVMKDAHLITRIE | 540 |
| pbp2a_40747 | IDKAFEYGQKFGLDMENVEKVLGVSIGSGVETNPLQMAQAY | ATFANKGVMKDAHLITRIE | 540 |
| pbp2a_41126 | IDKAFEYGQKFGLDMENVEKVLGVSIGSGVETNPLQMAQAY | ATFANKGVMKDAHLITRIE | 540 |
| pbp2A_P1/7  | IDKAFEYGQKFGLDMENVEKVLGVSIGSGVETNPLQMAQAY | ATFANKGVMKDAHLITRIE | 540 |
| pbp2a_32494 | IDKAFEYGQKFGLDMENVEKVLGVSIGSGVETNPLQMAQAY | ATFANKGVMKDAHLITRIE | 540 |
| pbp2a_30190 | IDKAFEYGQKFGLDMENVEKVLGVSIGSGVETNPLQMAQAY | ATFANKGVMKDAHLITRIE | 540 |

\*\*\*\*\*:\*\*\*\*\*.\*\*\*\*\*:\*\*\*.\*\*\*\*\*

|             |                                             |                      |     |
|-------------|---------------------------------------------|----------------------|-----|
| pbp2a_32098 | TASGKVLAEHRETSTKVIDRSVADKMTSMMLGTYTNGLGVSAD | ATNYYLAGKTGTTTETS    | 600 |
| pbp2a_33329 | TASGKVLAEHRETSTKVIDRSVADKMTSMMLGTYTNGLGVSAD | ATNYYLAGKTGTTTETS    | 600 |
| pbp2a_22715 | TASGKVLAEHRETSTKVIDRSVADKMTAMMLGTYTNGTGV    | TADTANYHLAGKTGTTTETS | 600 |
| pbp2a_37647 | TASGKVLAEHRETSTKVIDRSVADKMTAMMLGTYTNGTGV    | TADTANYHLAGKTGTTTETS | 600 |
| pbp2a_40085 | TASGKVLAEHRETSTKVIDRSVADKMTAMMLGTYTNGTGV    | TADTANYHLAGKTGTTTETS | 600 |
| pbp2a_40484 | TASGKVLAEHRETSTKVIDRSVADKMTAMMLGTYTNGTGV    | TADTANYHLAGKTGTTTETS | 600 |
| pbp2a_40747 | TASGKVLAEHRETSTKVIDRSVADKMTAMMLGTYTNGTGV    | TADTANYHLAGKTGTTTETS | 600 |
| pbp2a_41126 | TASGKVLAEHRETSTKVIDRSVADKMTAMMLGTYTNGTGV    | TADTANYHLAGKTGTTTETS | 600 |
| pbp2A_P1/7  | TASGKVLAEHRETSTKVIDRAVADKMTAMMLGTYTNGTGV    | TADTANYHLAGKTGTTTETS | 600 |
| pbp2a_32494 | TASGKVLAEHRETSTKVIDRAVADKMTAMMLGTYTNGTGV    | TADTANYHLAGKTGTTTETS | 600 |
| pbp2a_30190 | TASGKVLAEHRETSTKVIDRSVADKMTAMMLGTYTNGTGV    | TADTANYHLAGKTGTTTETS | 600 |

\*\*\*\*\*:\*\*\*\*\*:\*\*\*\*\*:\*\*\*\*\* \*\*:\*:\*\*\*:\*\*\*\*\*

|             |                                      |          |              |   |       |     |
|-------------|--------------------------------------|----------|--------------|---|-------|-----|
| pbp2a_32098 | DVNLVNDQWYIAYTPDLVISQWVGFEQTDENHYIDS | SGYWMAPT | TVFRTVADAILP | N | NTAGT | 660 |
| pbp2a_33329 | DVNLVNDQWYIAYTPDLVISQWVGFEQTDENHYIDS | SGYWMAPT | TVFRTVADAILP | N | NTAGT | 660 |
| pbp2a_22715 | DVNLVNDQWHIAYTPDLVISQWVGFEQTDENHYIDS | NSYWKAP  | SVFQTVANSILP | Y | TAGT  | 660 |
| pbp2a_37647 | DVNLVNDQWHIAYTPDLVISQWVGFEQTDENHYIDS | NSYWKAP  | SVFQTVANSILP | Y | TAGT  | 660 |
| pbp2a_40085 | DVNLVNDQWHIAYTPDLVISQWVGFEQTDENHYIDS | NSYWKAP  | SVFQTVANSILP | Y | TAGT  | 660 |
| pbp2a_40484 | DVNLVNDQWHIAYTPDLVISQWVGFEQTDENHYIDS | NSYWKAP  | SVFQTVANSILP | Y | TAGT  | 660 |
| pbp2a_40747 | DVNLVNDQWHIAYTPDLVISQWVGFEQTDENHYIDS | NSYWKAP  | SVFQTVANSILP | Y | TAGT  | 660 |
| pbp2a_41126 | DVNLVNDQWHIAYTPDLVISQWVGFEQTDENHYIDS | NSYWKAP  | SVFQTVANSILP | Y | TAGT  | 660 |
| pbp2A_P1/7  | DVNLVNDQWHIAYTPDLVISQWVGFEQTDENHYIDS | SSYWKAP  | SVFQTVANSILP | Y | TAGS  | 660 |
| pbp2a_32494 | DVNLVNDQWHIAYTPDLVISQWVGFEQTDENHYIDS | SSYWKAP  | SVFQTVANSILP | Y | TAGS  | 660 |
| pbp2a_30190 | DVNLVNDQWHIAYTPDLVISQWVGFEQTDENHYIDS | SSYWKAP  | SVFQTVANSILP | Y | TAGT  | 660 |
|             | *****:*****.*** **::*:***:*** **:    |          |              |   |       |     |

|             |                                       |       |           |            |     |  |
|-------------|---------------------------------------|-------|-----------|------------|-----|--|
| pbp2a_32098 | SFDVENAYVQNGIVEVAPDEAAQTESSLGQEQVQEIS | DQAKN | LIEQTKQNL | LIDAQLPERA | 720 |  |
| pbp2a_33329 | SFDVENAYVQNGIVEVAPDEAAQTESSLGQEQVQEIS | DQAKN | LIEQTKQNL | LIDAQLPERA | 720 |  |
| pbp2a_22715 | KFEVENAYAQNGIVEVAPDEAAQTESSLGQEQVQEIS | EQAKN | LIEQTKQNL | LIDAQLPERA | 720 |  |
| pbp2a_37647 | KFEVENAYAQNGIVEVAPDEAAQTESSLGQEQVQEIS | EQAKN | LIEQTKQNL | LIDAQLPERA | 720 |  |
| pbp2a_40085 | KFEVENAYAQNGIVEVAPDEAAQTESSLGQEQVQEIS | EQAKN | LIEQTKQNL | LIDAQLPERA | 720 |  |
| pbp2a_40484 | KFEVENAYAQNGIVEVAPDEAAQTESSLGQEQVQEIS | EQAKN | LIEQTKQNL | LIDAQLPERA | 720 |  |
| pbp2a_40747 | KFEVENAYAQNGIVEVAPDEAAQTESSLGQEQVQEIS | EQAKN | LIEQTKQNL | LIDAQLPERA | 720 |  |
| pbp2a_41126 | KFEVENAYAQNGIVEVAPDEAAQTESSLGQEQVQEIS | EQAKN | LIEQTKQNL | LIDAQLPERA | 720 |  |
| pbp2A_P1/7  | KFEVENAYAQNGIVEVAPDEAAQTESSLGQEQVQEIS | EQAKN | LIEQTKQNL | LIDAQLPERA | 720 |  |
| pbp2a_32494 | KFEVENAYAQNGIVEVAPDEAAQTESSLGQEQVQEIS | EQAKN | LIEQTKQNL | LIDAQLPERA | 720 |  |
| pbp2a_30190 | KFEVENAYAQNGIVEVAPDEAAQTESSLGQEQVQEIS | EQAKN | LIEQTKQNL | LIDAQLPERA | 720 |  |
|             | .:*****.*****:*****                   |       |           |            |     |  |

|             |                   |     |
|-------------|-------------------|-----|
| pbp2a_32098 | KTLWDNITSWFGELSNP | 737 |
| pbp2a_33329 | KTLWDNITSWFGELSNP | 737 |
| pbp2a_22715 | KTLWDNITSWFGELSNP | 737 |
| pbp2a_37647 | KTLWDNITSWFGELSNP | 737 |
| pbp2a_40085 | KTLWDNITSWFGELSNP | 737 |
| pbp2a_40484 | KTLWDNITSWFGELSNP | 737 |
| pbp2a_40747 | KTLWDNITSWFGELSNP | 737 |
| pbp2a_41126 | KTLWDNITSWFGELSNP | 737 |
| pbp2A_P1/7  | KTLWDNITSWFGELSNP | 737 |
| pbp2a_32494 | KTLWDNITSWFGELSNP | 737 |
| pbp2a_30190 | KTLWDNITSWFGELSNP | 737 |
|             | *****             |     |
