# Supplementary material for: Non-Penicillin-Susceptible Streptococcus suis Isolated from Humans
Source: MDPI journal article supplement (doi:10.3390/pathogens10091178), 2021-09-13
Supplement: s1 [file s1]

# Alignment of pbp1B sequence

|             |                                                                  |     |
|-------------|------------------------------------------------------------------|-----|
| pbp1b_32098 | MATKSDKQDFKKKISALGLGDDVVGVLRLTLKLLFNSVAVLVFLFGLFGAGIGIGFVVSFL    | 60  |
| pbp1b_33329 | MATKSDKQDFKKKISALGLGDDVVGVLRLTLKLLFNSVAVLVFLFGLFGAGIGIGFVVSFL    | 60  |
| pbp1B_P1/7  | MATKSDKQDFKKKISALGLGDDVVGVLRLTLKLLFNSVAVLVFLFGLFGAGIGIGFVVSFL    | 60  |
| pbp1b_32494 | MATKSDKQDFKKKISALGLGDDVVGVLRLTLKLLFNSVAVLVFLFGLFGAGIGIGFVVSFL    | 60  |
| pbp1b_22715 | MATKSDKQDFKKKISALVLGDDVVGVLRLTLKLLFNSVAVLVFLFGLFGAGIGIGFVVSFL    | 60  |
| pbp1b_37647 | MATKSDKQDFKKKISALVLGDDVVGVLRLTLKLLFNSVAVLVFLFGLFGAGIGIGFVVSFL    | 60  |
| pbp1b_40085 | MATKSDKQDFKKKISALVLGDDVVGVLRLTLKLLFNSVAVLVFLFGLFGAGIGIGFVVSFL    | 60  |
| pbp1b_40484 | MATKSDKQDFKKKISALVLGDDVVGVLRLTLKLLFNSVAVLVFLFGLFGAGIGIGFVVSFL    | 60  |
| pbp1b_40747 | MATKSDKQDFKKKISALVLGDDVVGVLRLTLKLLFNSVAVLVFLFGLFGAGIGIGFVVSFL    | 60  |
| pbp1b_41126 | MATKSDKQDFKKKISALVLGDDVVGVLRLTLKLLFNSVAVLVFLFGLFGAGIGIGFVVSFL    | 60  |
| pbp1b_30190 | MATKSDKQDFKKKISALVLGDDVVGVLRLTLKLLFNSVAVLVFLFGLFGAGIGIGFVVSFL    | 60  |
| *****       |                                                                  |     |
| pbp1b_32098 | DDVKIPKTEELVAKVSEVSRISTVTYSDGSLVSEVNSDLLRVPITSEEVSNYLKQAVIAT     | 120 |
| pbp1b_33329 | DDVKIPKTEELVAKVSEVSRISTVTYSDGSLVSEVNSDLLRVPITSEEVSNYLKQAVIAT     | 120 |
| pbp1B_P1/7  | DDVKIPKTEELVAKVSEVSRISTVTYSDGSLVSEVNSDLLRVPITSEEVSNYLKQAVIAT     | 120 |
| pbp1b_32494 | DDVKIPKTEELVAKVSEVSRISTVTYSDGSLVSEVNSDLLRVPITSEEVSNYLKQAVIAT     | 120 |
| pbp1b_22715 | DDVKIPKTEELVAKVSEVSRISTVTYSDGSLVSEVNSDLLRVPITSEEVSNYLKQAVIAT     | 120 |
| pbp1b_37647 | DDVKIPKTEELVAKVSEVSRISTVTYSDGSLVSEVNSDLLRVPITSEEVSNYLKQAVIAT     | 120 |
| pbp1b_40085 | DDVKIPKTEELVAKVSEVSRISTVTYSDGSLVSEVNSDLLRVPITSEEVSNYLKQAVIAT     | 120 |
| pbp1b_40484 | DDVKIPKTEELVAKVSEVSRISTVTYSDGSLVSEVNSDLLRVPITSEEVSNYLKQAVIAT     | 120 |
| pbp1b_40747 | DDVKIPKTEELVAKVSEVSRISTVTYSDGSLVSEVNSDLLRVPITSEEVSNYLKQAVIAT     | 120 |
| pbp1b_41126 | DDVKIPKTEELVAKVSEVSRISTVTYSDGSLVSEVNSDLLRVPITSEEVSNYLKQAVIAT     | 120 |
| pbp1b_30190 | DDVKIPKTEELVAKVSEVSRISTVTYSDGSLVSEVNSDLLRVPITSEEVSNYLKQAVIAT     | 120 |
| *****       |                                                                  |     |
| pbp1b_32098 | EDETFFETHNGVVPKAVLRAALGSVGLGSSSSGGSTLTQQLIKQQLVGDAPTFTRKANEIVS   | 180 |
| pbp1b_33329 | EDETFFETHNGVVPKAVLRAALGSVGLGSSSSGGSTLTQQLIKQQLVGDAPTFTRKANEIVS   | 180 |
| pbp1B_P1/7  | EDETFFETHNGVVPKAVLRAALGSVGLGSSSSGGSTLTQQLIKQQLVGDAPTFTRKANEIVS   | 180 |
| pbp1b_32494 | EDETFFETHNGVVPKAVLRAALGSVGLGSSSSGGSTLTQQLIKQQLVGDAPTFTRKANEIVS   | 180 |
| pbp1b_22715 | EDETFFETHNGVVPKAVLRAALGSVGLGSSSSGGSTLTQQLIKQQLVGDAPTFTRKANEIVS   | 180 |
| pbp1b_37647 | EDETFFETHNGVVPKAVLRAALGSVGLGSSSSGGSTLTQQLIKQQLVGDAPTFTRKANEIVS   | 180 |
| pbp1b_40085 | EDETFFETHNGVVPKAVLRAALGSVGLGSSSSGGSTLTQQLIKQQLVGDAPTFTRKANEIVS   | 180 |
| pbp1b_40484 | EDETFFETHNGVVPKAVLRAALGSVGLGSSSSGGSTLTQQLIKQQLVGDAPTFTRKANEIVS   | 180 |
| pbp1b_40747 | EDETFFETHNGVVPKAVLRAALGSVGLGSSSSGGSTLTQQLIKQQLVGDAPTFTRKANEIVS   | 180 |
| pbp1b_41126 | EDETFFETHNGVVPKAVLRAALGSVGLGSSSSGGSTLTQQLIKQQLVGDAPTFTRKANEIVS   | 180 |
| pbp1b_30190 | EDETFFETHNGVVPKAVLRAALGSVGLGSSSSGGSTLTQQLIKQQLVGDAPTFTRKANEIVS   | 180 |
| *****       |                                                                  |     |
| pbp1b_32098 | ALALERNMTKEEILTIYLNVS PFGRNNQGRNIAGVEAAAQGIFGKPAKDLTPVQA AFIAG   | 240 |
| pbp1b_33329 | ALALERNMTKEEILTIYLNVS PFGRNNQGRNIAGVEAAAQGIFGKPAKDLTPVQA AFIAG   | 240 |
| pbp1B_P1/7  | ALALERNMTKEEILTIYLNVS PFGRNNQGRNIAGVEAAAQGIFGKPAKDLTPVQA AFIAG   | 240 |
| pbp1b_32494 | ALALERNMTKEEILTIYLNVS PFGRNNQGRNIAGVEAAAQGIFGKPAKDLTPVQA AFIAG   | 240 |
| pbp1b_22715 | ALALERNMTKEEILTIYLNVS PFGRNNQGRNIAGVEAAAQGIFGKPAKDLTPVQA AFIAG   | 240 |
| pbp1b_37647 | ALALERNMTKEEILTIYLNVS PFGRNNQGRNIAGVEAAAQGIFGKPAKDLTPVQA AFIAG   | 240 |
| pbp1b_40085 | ALALERNMTKEEILTIYLNVS PFGRNNQGRNIAGVEAAAQGIFGKPAKDLTPVQA AFIAG   | 240 |
| pbp1b_40484 | ALALERNMTKEEILTIYLNVS PFGRNNQGRNIAGVEAAAQGIFGKPAKDLTPVQA AFIAG   | 240 |
| pbp1b_40747 | ALALERNMTKEEILTIYLNVS PFGRNNQGRNIAGVEAAAQGIFGKPAKDLTPVQA AFIAG   | 240 |
| pbp1b_41126 | ALALERNMTKEEILTIYLNVS PFGRNNQGRNIAGVEAAAQGIFGKPAKDLTPVQA AFIAG   | 240 |
| pbp1b_30190 | ALALERNMTKEEILTIYLNVS PFGRNNQGRNIAGVEAAAQGIFGKPAKDLTPVQA AFIAG   | 240 |
| *****       |                                                                  |     |
| pbp1b_32098 | LPQSPIVYSPYASDGTRK ADEDMVYG IERYQDVLFNMYRASFLTKEEYET YKAYDIKQDF  | 300 |
| pbp1b_33329 | LPQSPIVYSPYASDGTRK ADEDMVYG IERYQDVLFNMYRASFLTKEEYET YKAYDIKQDF  | 300 |
| pbp1B_P1/7  | LPQSPIVYSPYASDGTRK SDEDMVYG IERYQDVLFNMYRASFLTKEEYET YKAYDIKQDF  | 300 |
| pbp1b_32494 | LPQSPIVYSPYASDGTRK SDEDMVYG IERYQDVLFNMYRASFLTKEEYET YKAYDIKQDF  | 300 |
| pbp1b_22715 | LPQSPIVYSPYASDGTRK SDEDMVYG V ERYQDVLFNMYRASFLTKEEYET YKAYDIKQDF | 300 |
| pbp1b_37647 | LPQSPIVYSPYASDGTRK SDEDMVYG V ERYQDVLFNMYRASFLTKEEYET YKAYDIKQDF | 300 |
| pbp1b_40085 | LPQSPIVYSPYASDGTRK SDEDMVYG V ERYQDVLFNMYRASFLTKEEYET YKAYDIKQDF | 300 |
| pbp1b_40484 | LPQSPIVYSPYASDGTRK SDEDMVYG V ERYQDVLFNMYRASFLTKEEYET YKAYDIKQDF | 300 |
| pbp1b_40747 | LPQSPIVYSPYASDGTRK SDEDMVYG V ERYQDVLFNMYRASFLTKEEYET YKAYDIKQDF | 300 |
| pbp1b_41126 | LPQSPIVYSPYASDGTRK SDEDMVYG V ERYQDVLFNMYRASFLTKEEYET YKAYDIKQDF | 300 |
| pbp1b_30190 | LPQSPIVYSPYASDGTRK SDEDMVYG V ERYQDVLFNMYRASFLTKEEYET YKAYDIKQDF | 300 |
| *****       |                                                                  |     |

|             |                                        |                         |     |
|-------------|----------------------------------------|-------------------------|-----|
| pbp1b_32098 | IAPAPVMADTKDYLLYEVMEEAQEVMSFDYLVKRDKVS | ENDLNKNETKASYEELAKQELSQ | 360 |
| pbp1b_33329 | IAPAPVMADTKDYLLYEVMEEAQEVMSFDYLVKRDKVS | ENDLNKNETKASYEELAKQELSQ | 360 |
| pbp1b_P1/7  | IAPAPVMADTKDYLLYKVMEEAQEVMSFDYLVKRDKVS | KNDLNKNETKASYEELAKQELSQ | 360 |
| pbp1b_32494 | IAPAPVMADTKDYLLYKVMEEAQEVMSFDYLVKRDKVS | KNDLNKNETKASYEELAKQELSQ | 360 |
| pbp1b_22715 | IAPAPVMADTKDYLLYKVMEEAQEVMSFDYLVKRDKVS | KNDLNKNETKASYEELAKQELSQ | 360 |
| pbp1b_37647 | IAPAPVMADTKDYLLYKVMEEAQEVMSFDYLVKRDKVS | KNDLNKNETKASYEELAKQELSQ | 360 |
| pbp1b_40085 | IAPAPVMADTKDYLLYKVMEEAQEVMSFDYLVKRDKVS | KNDLNKNETKASYEELAKQELSQ | 360 |
| pbp1b_40484 | IAPAPVMADTKDYLLYKVMEEAQEVMSFDYLVKRDKVS | KNDLNKNETKASYEELAKQELSQ | 360 |
| pbp1b_40747 | IAPAPVMADTKDYLLYKVMEEAQEVMSFDYLVKRDKVS | KNDLNKNETKASYEELAKQELSQ | 360 |
| pbp1b_41126 | IAPAPVMADTKDYLLYKVMEEAQEVMSFDYLVKRDKVS | KNDLNKNETKASYEELAKQELSQ | 360 |
| pbp1b_30190 | IAPAPVMADTKDYLLYKVMEEAQEVMSFDYLVKRDKVS | KNDLNKNETKASYEELAKQELSQ | 360 |

\*\*\*\*\*:\*\*\*\*\*:\*\*\*\*\*

|             |                                                            |    |     |
|-------------|------------------------------------------------------------|----|-----|
| pbp1b_32098 | GGYTIKSTVDQGIYAAMQSVVANYGSVLDDGNEYVETGSVLIDNATGAILGFVGGRDY | AT | 420 |
| pbp1b_33329 | GGYTIKSTVDQGIYAAMQSVVANYGSVLDDGNEYVETGSVLIDNATGAILGFVGGRDY | AT | 420 |
| pbp1b_P1/7  | GGYTIKSTVDQKIYAAMQSVVANYGSVLDDGNEYVETGSVLIDNATGAILGFVGGRDY | AT | 420 |
| pbp1b_32494 | GGYTIKSTVDQKIYAAMQSVVANYGSVLDDGNEYVETGSVLIDNATGAILGFVGGRDY | AT | 420 |
| pbp1b_22715 | GGYTIKSTVDQGIYAAMQSVVANYGSVLDDGNEYVETGSVLIDNATGAILGFVGGRDY | ST | 420 |
| pbp1b_37647 | GGYTIKSTVDQGIYAAMQSVVANYGSVLDDGNEYVETGSVLIDNATGAILGFVGGRDY | ST | 420 |
| pbp1b_40085 | GGYTIKSTVDQGIYAAMQSVVANYGSVLDDGNEYVETGSVLIDNATGAILGFVGGRDY | ST | 420 |
| pbp1b_40484 | GGYTIKSTVDQGIYAAMQSVVANYGSVLDDGNEYVETGSVLIDNATGAILGFVGGRDY | ST | 420 |
| pbp1b_40747 | GGYTIKSTVDQGIYAAMQSVVANYGSVLDDGNEYVETGSVLIDNATGAILGFVGGRDY | ST | 420 |
| pbp1b_41126 | GGYTIKSTVDQGIYAAMQSVVANYGSVLDDGNEYVETGSVLIDNATGAILGFVGGRDY | ST | 420 |
| pbp1b_30190 | GGYTIKSTVDQGIYAAMQSVVANYGSVLDDGNEYVETGSVLIDNATGAILGFVGGRDY | ST | 420 |

\*\*\*\*\* \*\*\*\*\*:\*

|             |                                                          |       |     |
|-------------|----------------------------------------------------------|-------|-----|
| pbp1b_32098 | NQNNHAFDTRLRSPASTIKPLLAYGIAIDQGLIGSASILSDYPTNFSSGQPIMYGS | GRGTG | 480 |
| pbp1b_33329 | NQNNHAFDTRLRSPASTIKPLLAYGIAIDQGLIGSASILSDYPTNFSSGQPIMYGS | GRGTG | 480 |
| pbp1b_P1/7  | NQNNHAFDTRLRSPASTIKPLLAYGIAIDQGLIGSASILSDYPTNFSSGQPIMYGS | GRGTG | 480 |
| pbp1b_32494 | NQNNHAFDTRLRSPASTIKPLLAYGIAIDQGLIGSASILSDYPTNFSSGQPIMYGS | GRGTG | 480 |
| pbp1b_22715 | NQNNHAFDTRLRSPASTIKPLLAYGIAIDQGLIGSASILSDYPTNFSSGQPIMYGS | RRGTG | 480 |
| pbp1b_37647 | NQNNHAFDTRLRSPASTIKPLLAYGIAIDQGLIGSASILSDYPTNFSSGQPIMYGS | RRGTG | 480 |
| pbp1b_40085 | NQNNHAFDTRLRSPASTIKPLLAYGIAIDQGLIGSASILSDYPTNFSSGQPIMYGS | RRGTG | 480 |
| pbp1b_40484 | NQNNHAFDTRLRSPASTIKPLLAYGIAIDQGLIGSASILSDYPTNFSSGQPIMYGS | RRGTG | 480 |
| pbp1b_40747 | NQNNHAFDTRLRSPASTIKPLLAYGIAIDQGLIGSASILSDYPTNFSSGQPIMYGS | RRGTG | 480 |
| pbp1b_41126 | NQNNHAFDTRLRSPASTIKPLLAYGIAIDQGLIGSASILSDYPTNFSSGQPIMYGS | RRGTG | 480 |
| pbp1b_30190 | NQNNHAFDTRLRSPASTIKPLLAYGIAIDQGLIGSASILSDYPTNFSSGQPIMYGS | RRGTG | 480 |

\*\*\*\*\* \*\*\*\*

|             |                                                              |  |     |
|-------------|--------------------------------------------------------------|--|-----|
| pbp1b_32098 | MMNLQTAIDRSVNIPAFWYTKMMRNAGVDAKAYMDKMNYHIPMYDIESVPLGGGVEISVL |  | 540 |
| pbp1b_33329 | MMNLQTAIDRSVNIPAFWYTKMMRNAGVDAKAYMDKMNYHIPMYDIESVPLGGGVEISVL |  | 540 |
| pbp1b_P1/7  | MMNLQTAIDRSVNIPAFWYTKMMRNAGVDAKAYMDKMNYHIPMYDIESVPLGGGVEISVL |  | 540 |
| pbp1b_32494 | MMNLQTAIDRSVNIPAFWYTKMMRNAGVDAKAYMDKMNYHIPMYDIESVPLGGGVEISVL |  | 540 |
| pbp1b_22715 | MMNLQTAIDRSVNIPAFWYTKMMRNAGVDAKAYMDKMNYHIPMYDIESVPLGGGVEISVL |  | 540 |
| pbp1b_37647 | MMNLQTAIDRSVNIPAFWYTKMMRNAGVDAKAYMDKMNYHIPMYDIESVPLGGGVEISVL |  | 540 |
| pbp1b_40085 | MMNLQTAIDRSVNIPAFWYTKMMRNAGVDAKAYMDKMNYHIPMYDIESVPLGGGVEISVL |  | 540 |
| pbp1b_40484 | MMNLQTAIDRSVNIPAFWYTKMMRNAGVDAKAYMDKMNYHIPMYDIESVPLGGGVEISVL |  | 540 |
| pbp1b_40747 | MMNLQTAIDRSVNIPAFWYTKMMRNAGVDAKAYMDKMNYHIPMYDIESVPLGGGVEISVL |  | 540 |
| pbp1b_41126 | MMNLQTAIDRSVNIPAFWYTKMMRNAGVDAKAYMDKMNYHIPMYDIESVPLGGGVEISVL |  | 540 |
| pbp1b_30190 | MMNLQTAIDRSVNIPAFWYTKMMRNAGVDAKAYMDKMNYHIPMYDIESVPLGGGVEISVL |  | 540 |

\*\*\*\*\*:\*\*\*\*\*

|             |                                       |                         |     |
|-------------|---------------------------------------|-------------------------|-----|
| pbp1b_32098 | TNTNAYQTLANGGVYNKHYIVESITASDGTVVYQHEA | APVQVYSKATASIMNQLLRQVVN | 600 |
| pbp1b_33329 | TNTNAYQTLANGGVYNKHYIVESITASDGTVVYQHEA | APVQVYSKATASIMNQLLRQVVN | 600 |
| pbp1b_P1/7  | TNTNAYQTLANGGVYNKHYIVESITASDGTVVYQHEA | TPVQVYSKATASIMNQLLRQVVN | 600 |
| pbp1b_32494 | TNTNAYQTLANGGVYNKHYIVESITASDGTVVYQHEA | TPVQVYSKATASIMNQLLRQVVN | 600 |
| pbp1b_22715 | TNTNAYQTLANGGVYNKHYIVESITASDGTVVYQHEA | APVQVYSKATASIMNQLLRQVVN | 600 |
| pbp1b_37647 | TNTNAYQTLANGGVYNKHYIVESITASDGTVVYQHEA | APVQVYSKATASIMNQLLRQVVN | 600 |
| pbp1b_40085 | TNTNAYQTLANGGVYNKHYIVESITASDGTVVYQHEA | APVQVYSKATASIMNQLLRQVVN | 600 |
| pbp1b_40484 | TNTNAYQTLANGGVYNKHYIVESITASDGTVVYQHEA | APVQVYSKATASIMNQLLRQVVN | 600 |
| pbp1b_40747 | TNTNAYQTLANGGVYNKHYIVESITASDGTVVYQHEA | APVQVYSKATASIMNQLLRQVVN | 600 |
| pbp1b_41126 | TNTNAYQTLANGGVYNKHYIVESITASDGTVVYQHEA | APVQVYSKATASIMNQLLRQVVN | 600 |
| pbp1b_30190 | TNTNAYQTLANGGVYNKHYIVESITASDGTVVYQHEA | APVQVYSKATASIMNQLLRQVVN | 600 |

\*\*\*\*\*:\*\*\*\*\*

|             |                                                                |     |
|-------------|----------------------------------------------------------------|-----|
| pbp1b_32098 | SGYTTTTFKSRLSGLNPQAASSDFVGKTGTSNEVNDVWMLMLSTPRVTLGTWAGNDDNSEMY | 660 |
| pbp1b_33329 | SGYTTTTFKSRLSGLNPQAASSDFVGKTGTSNEVNDVWMLMLSTPRVTLGTWAGNDDNSEMY | 660 |
| pbp1B_P1/7  | SGYTTTTFKSRLSGLNPQAASSDFVGKTGTSNEVNDVWMLMLSTPRVTLGTWAGNDDNSEMY | 660 |
| pbp1b_32494 | SGYTTTTFKSRLSGLNPQAASSDFVGKTGTSNEVNDVWMLMLSTPRVTLGTWAGNDDNSEMY | 660 |
| pbp1b_22715 | SGYTTTTFKSRLSGLNPQAASSDFVGKTGTSNEVNDVWMLMLSTPRVTLGTWAGNDDNSEMY | 660 |
| pbp1b_37647 | SGYTTTTFKSRLSGLNPQAASSDFVGKTGTSNEVNDVWMLMLSTPRVTLGTWAGNDDNSEMY | 660 |
| pbp1b_40085 | SGYTTTTFKSRLSGLNPQAASSDFVGKTGTSNEVNDVWMLMLSTPRVTLGTWAGNDDNSEMY | 660 |
| pbp1b_40484 | SGYTTTTFKSRLSGLNPQAASSDFVGKTGTSNEVNDVWMLMLSTPRVTLGTWAGNDDNSEMY | 660 |
| pbp1b_40747 | SGYTTTTFKSRLSGLNPQAASSDFVGKTGTSNEVNDVWMLMLSTPRVTLGTWAGNDDNSEMY | 660 |
| pbp1b_41126 | SGYTTTTFKSRLSGLNPQAASSDFVGKTGTSNEVNDVWMLMLSTPRVTLGTWAGNDDNSEMY | 660 |
| pbp1b_30190 | SGYTTTTFKSRLSGLNPQAASSDFVGKTGTSNEVNDVWMLMLSTPRVTLGTWAGNDDNSEMY | 660 |
|             | *****                                                          |     |

|             |                                                             |     |
|-------------|-------------------------------------------------------------|-----|
| pbp1b_32098 | VWTGYHNNSQYVAHMDALYNVNADMFAGKFELDSSVIASSVVASTGQRAGTTQVNGRQV | 720 |
| pbp1b_33329 | VWTGYHNNSQYVAHMDALYNVNADMFAGKFELDSSVIASSVVASTGQRAGTTQVNGRQV | 720 |
| pbp1B_P1/7  | VWTGYHNNSQYVAHMDALYNVNADMFAGKFELDSSVIASSVVASTGQRAGTTQVNGRQV | 720 |
| pbp1b_32494 | VWTGYHNNSQYVAHMDALYNVNADMFAGKFELDSSVIASSVVASTGQRAGTTQVNGRQV | 720 |
| pbp1b_22715 | VWTGYHNNSQYVAHMDALYNVNADMFAGKFELDSSVIASSVVASTGQRAGTTQVNGRQV | 720 |
| pbp1b_37647 | VWTGYHNNSQYVAHMDALYNVNADMFAGKFELDSSVIASSVVASTGQRAGTTQVNGRQV | 720 |
| pbp1b_40085 | VWTGYHNNSQYVAHMDALYNVNADMFAGKFELDSSVIASSVVASTGQRAGTTQVNGRQV | 720 |
| pbp1b_40484 | VWTGYHNNSQYVAHMDALYNVNADMFAGKFELDSSVIASSVVASTGQRAGTTQVNGRQV | 720 |
| pbp1b_40747 | VWTGYHNNSQYVAHMDALYNVNADMFAGKFELDSSVIASSVVASTGQRAGTTQVNGRQV | 720 |
| pbp1b_41126 | VWTGYHNNSQYVAHMDALYNVNADMFAGKFELDSSVIASSVVASTGQRAGTTQVNGRQV | 720 |
| pbp1b_30190 | VWTGYHNNSQYVAHMDALYNVNADMFAGKFELDSSVIASSVVASTGQRAGTTQVNGRQV | 720 |
|             | *****                                                       |     |

|             |                                                              |     |
|-------------|--------------------------------------------------------------|-----|
| pbp1b_32098 | TVGGAMTTSYWAKNGAPVTSYNFMVGGTDSdraQAWNTIIGSQTPTSSSSTQRSSSTRTS | 780 |
| pbp1b_33329 | TVGGAMTTSYWAKNGAPVTSYNFMVGGTDSdraQAWNTIIGSQTPTSSSSTQRSSSTRTS | 780 |
| pbp1B_P1/7  | TVGGAMTTSYWAKNGAPVTSYNFMVGGTDSdraQAWNTIIGSQTATSSSSTQRSSSTRSS | 780 |
| pbp1b_32494 | TVGGAMTTSYWAKNGAPVTSYNFMVGGTDSdraQAWNTIIGSQTATSSSSTQRSSSTRSS | 780 |
| pbp1b_22715 | TVGGAMTTSYWAKNGAPVTSYNFMVGGTDSdraQAWNTIIGSQTPTSSSSTQRSSSTRSS | 780 |
| pbp1b_37647 | TVGGAMTTSYWAKNGAPVTSYNFMVGGTDSdraQAWNTIIGSQTPTSSSSTQRSSSTRSS | 780 |
| pbp1b_40085 | TVGGAMTTSYWAKNGAPVTSYNFMVGGTDSdraQAWNTIIGSQTPTSSSSTQRSSSTRSS | 780 |
| pbp1b_40484 | TVGGAMTTSYWAKNGAPVTSYNFMVGGTDSdraQAWNTIIGSQTPTSSSSTQRSSSTRSS | 780 |
| pbp1b_40747 | TVGGAMTTSYWAKNGAPVTSYNFMVGGTDSdraQAWNTIIGSQTPTSSSSTQRSSSTRSS | 780 |
| pbp1b_41126 | TVGGAMTTSYWAKNGAPVTSYNFMVGGTDSdraQAWNTIIGSQTPTSSSSTQRSSSTRSS | 780 |
| pbp1b_30190 | TVGGAMTTSYWAKNGAPVTSYNFMVGGTDSdraQAWNTIIGSQTPTSSSSTQRSSSTRSS | 780 |
|             | ***** *****:*                                                |     |

|             |                              |     |
|-------------|------------------------------|-----|
| pbp1b_32098 | TSSSANNTNQSSSETQTATSEQANNDSP | 807 |
| pbp1b_33329 | TSSSANNTNQSSSETQTATSEQANNDSP | 807 |
| pbp1B_P1/7  | TSSSANNTNQSSSETQTATSEQANNDSP | 807 |
| pbp1b_32494 | TSSSANNTNQSSSETQTATSEQANNDSP | 807 |
| pbp1b_22715 | TSSSANNTNQSSSETQTATSEQANNDSP | 807 |
| pbp1b_37647 | TSSSANNTNQSSSETQTATSEQANNDSP | 807 |
| pbp1b_40085 | TSSSANNTNQSSSETQTATSEQANNDSP | 807 |
| pbp1b_40484 | TSSSANNTNQSSSETQTATSEQANNDSP | 807 |
| pbp1b_40747 | TSSSANNTNQSSSETQTATSEQANNDSP | 807 |
| pbp1b_41126 | TSSSANNTNQSSSETQTATSEQANNDSP | 807 |
| pbp1b_30190 | TSSSANNTNQSSSETQTATSEQANNDSP | 807 |
|             | *****                        |     |
