# Supplementary material for: Non-Penicillin-Susceptible Streptococcus suis Isolated from Humans
Source: MDPI journal article supplement (doi:10.3390/pathogens10091178), 2021-09-13
Supplement: s1 [file s1]

## Alignment of pbp2B sequence

|               |                                                                           |     |
|---------------|---------------------------------------------------------------------------|-----|
| pbp2b_32098   | MKKRRKNKPLEHDGNFISLRNLILFSIVIFLFLVLILRLADMQIINHDFYSNKLSTASQKI             | 60  |
| pbp2b_33329   | MKKRRKNKPLEHDGNFISLRNLILFSIVIFLFLVLILRLADMQIINHDFYSNKLSTASQKI             | 60  |
| pbp2b_37647   | MKKRRKNKPLEHDGNFISLRNLILFSIVIFLFLVLILRLADMQIINHDFYSNKLSTASQKI             | 60  |
| pbp2b_40085   | MKKRRKNKPLEHDGNFISLRNLILFSIVIFLFLVLILRLADMQIINHDFYSNKLSTASQKI             | 60  |
| pbp2b_40484   | MKKRRKNKPLEHDGNFISLRNLILFSIVIFLFLVLILRLADMQIINHDFYSNKLSTASQKI             | 60  |
| pbp2b_40747   | MKKRRKNKPLEHDGNFISLRNLILFSIVIFLFLVLILRLADMQIINHDFYSNKLSTASQKI             | 60  |
| pbp2b_41126   | MKKRRKNKPLEHDGNFISLRNLILFSIVIFLFLVLILRLADMQIINHDFYSNKLSTASQKI             | 60  |
| pbp2b_30190   | MKKRRKNKPLEHDGNFISLRNLILFSIVIFLFLVLILRLADMQIINHDFYSNKLSTASQKI             | 60  |
| pbp2b_P1/7    | MKKRRKNKPLEHDGNFISLRNLILFSIVIFLFLVLILRLADMQIINHDFYSNKLSTASQKI             | 60  |
| pbp2b_32494   | MKKRRKNKPLEHDGNFISLRNLILFSIVIFLFLVLILRLADMQIINHDFYSNKLSTASQKI             | 60  |
| pbp2b_22715   | MKKRRKNKPLEHDGNFISLRNLILFSIVIFLFLVLILRLADMQIINHDFYSNKLSTASQKI             | 60  |
| *****         |                                                                           |     |
| pbp2b_32098   | ISNGSIRGQIYDAQGKPLVENEIQQVVSFTRSNKMSAQEMKEVANKLLQWVNVSDVTITQ              | 120 |
| pbp2b_33329   | ISNGSIRGQIYDAQGKPLVENEIQQVVSFTRSNKMSAQEMKEVANKLLQWVNVSDVTITQ              | 120 |
| pbp2b_37647   | ISNGSIRGQIYDAQGKPLVENEIQQVVSFTRSNKMSAQEMKEVANKLLQWVNVSDVTITQ              | 120 |
| pbp2b_40085   | ISNGSIRGQIYDAQGKPLVENEIQQVVSFTRSNKMSAQEMKEVANKLLQWVNVSDVTITQ              | 120 |
| pbp2b_40484   | ISNGSIRGQIYDAQGKPLVENEIQQVVSFTRSNKMSAQEMKEVANKLLQWVNVSDVTITQ              | 120 |
| pbp2b_40747   | ISNGSIRGQIYDAQGKPLVENEIQQVVSFTRSNKMSAQEMKEVANKLLQWVNVSDVTITQ              | 120 |
| pbp2b_41126   | ISNGSIRGQIYDAQGKPLVENEIQQVVSFTRSNKMSAQEMKEVANKLLQWVNVSDVTITQ              | 120 |
| pbp2b_30190   | ISNGSIRGQIYDAQGKPLVENEIQQVVSFTRPNKMSAQEMKEVANKLLQWVNVSDVTITQ              | 120 |
| pbp2b_P1/7    | ISNGSIRGQIYDAQGKPLVENEIQQVVSFTRPNKMSAQEMKEVANKLLQWVNVSDVTITQ              | 120 |
| pbp2b_32494   | ISNGSIRGQIYDAQGKPLVENEIQQVVSFTRPNKMSAQEMKEVANKLLQWVNVSDVTITQ              | 120 |
| pbp2b_22715   | ISNGSIRGQIYDAQGKPLVENEIQQVVSFTRPNKMSAQEMKEVANKLLQWVNVSDVTITQ              | 120 |
| *****         |                                                                           |     |
| pbp2b_32098   | RDKADYYLADEEVYRQVVEALPEDKKYDSGNYLSESTIYSNAVDSIPAEALQYSEQDSK               | 180 |
| pbp2b_33329   | RDKADYYLADEEVYRQVVEALPEDKKYDSGNYLSESTIYSNAVDSIPAEALQYSEQDSK               | 180 |
| pbp2b_37647   | RDKADYYLADEEVYRQVVEALPEDKKYDSGNYLSESTIYSNAVDSIPAEALQYSEQDSK               | 180 |
| pbp2b_40085   | RDKADYYLADEEVYRQVVEALPEDKKYDSGNYLSESTIYSNAVDSIPAEALQYSEQDSK               | 180 |
| pbp2b_40484   | RDKADYYLADEEVYRQVVEALPEDKKYDSGNYLSESTIYSNAVDSIPAEALQYSEQDSK               | 180 |
| pbp2b_40747   | RDKADYYLADEEVYRQVVEALPEDKKYDSGNYLSESTIYSNAVDSIPAEALQYSEQDSK               | 180 |
| pbp2b_41126   | RDKADYYLADEEVYRQVVEALPEDKKYDSGNYLSESTIYSNAVDSIPAEALQYSEQDSK               | 180 |
| pbp2b_30190   | RDKADYYLADEEVYRQVVEALPKDKKYDSGNYLSESTIYSNAVDSIPAEALQYSEQDNK               | 180 |
| pbp2b_P1/7    | RDKADYYLADEEVYRQVVEALPKDKKYDSGNYLSESTIYSNAVDSIPAEALQYSEQDNK               | 180 |
| pbp2b_32494   | RDKADYYLADEEVYRQVVEALPKDKKYDSGNYLSESTIYSNAVDSIPAEALQYSEQDNK               | 180 |
| pbp2b_22715   | RDKADYYLADEEVYRQVVEALPKDKKYDSGNYLSESTIYSNAVDSIPAEALQYSEQDNK               | 180 |
| *****:*****.* |                                                                           |     |
| pbp2b_32098   | AIELFKQMNGATYFSTVNLVTDTLTAEQVAHIVANESQLPGISTTNNWQRN <del>I</del> LPTSLSSV | 240 |
| pbp2b_33329   | AIELFKQMNGATYFSTVNLVTDTLTAEQVAHIVANESQLPGISTTNNWQRN <del>I</del> LPTSLSSV | 240 |
| pbp2b_37647   | AIELFKQMNGATYFSTVNLVTDTLTAEQVAHIVANESQLPGISTTNNWQRT <del>I</del> LPTSLSSI | 240 |
| pbp2b_40085   | AIELFKQMNGATYFSTVNLVTDTLTAEQVAHIVANESQLPGISTTNNWQRT <del>I</del> LPTSLSSI | 240 |
| pbp2b_40484   | AIELFKQMNGATYFSTVNLVTDTLTAEQVAHIVANESQLPGISTTNNWQRT <del>I</del> LPTSLSSI | 240 |
| pbp2b_40747   | AIELFKQMNGATYFSTVNLVTDTLTAEQVAHIVANESQLPGISTTNNWQRT <del>I</del> LPTSLSSI | 240 |
| pbp2b_41126   | AIELFKQMNGATYFSTVNLVTDTLTAEQVAHIVANESQLPGISTTNNWQRT <del>I</del> LPTSLSSI | 240 |
| pbp2b_30190   | AIELFKQMNGATYFSTVNLVTDTLTSEQVAHIVANESQLPGISTTNNWQRT <del>I</del> LPTSLSSI | 240 |
| pbp2b_P1/7    | AIELFKQMNGATYFSTVNLVTDTLTSEQVAHIVANESQLPGISTTNNWQRT <del>I</del> LPTSLSSI | 240 |
| pbp2b_32494   | AIELFKQMNGATYFSTVNLVTDTLTSEQVAHIVANESQLPGISTTNNWQRT <del>I</del> LPTSLSSI | 240 |
| pbp2b_22715   | AIELFKQMNGATYFSTVNLVTDTLTSEQVAHIVANESQLPGISTTNNWQRT <del>I</del> LPTSLSSI | 240 |
| *****:*****.* |                                                                           |     |
| pbp2b_32098   | IGTVTSEQAGLPAEDAEEYLSKGYSPNDRVGTAYLEKQYEEVLQGQREKK <del>E</del> INLDRNGNV | 300 |
| pbp2b_33329   | IGTVTSEQAGLPAEDAEEYLSKGYSPNDRVGTAYLEKQYEEVLQGQREKK <del>E</del> INLDRNGNV | 300 |
| pbp2b_37647   | IGTVTSEQAGLPAEDAEEYLSKGYSPNDRVGTAYLEKQYEEVLQGQREKK <del>Q</del> INLDRNGNV | 300 |
| pbp2b_40085   | IGTVTSEQAGLPAEDAEEYLSKGYSPNDRVGTAYLEKQYEEVLQGQREKK <del>Q</del> INLDRNGNV | 300 |
| pbp2b_40484   | IGTVTSEQAGLPAEDAEEYLSKGYSPNDRVGTAYLEKQYEEVLQGQREKK <del>Q</del> INLDRNGNV | 300 |
| pbp2b_40747   | IGTVTSEQAGLPAEDAEEYLSKGYSPNDRVGTAYLEKQYEEVLQGQREKK <del>Q</del> INLDRNGNV | 300 |
| pbp2b_41126   | IGTVTSEQAGLPAEDAEEYLSKGYSPNDRVGTAYLEKQYEEVLQGQREKK <del>Q</del> INLDRNGNV | 300 |
| pbp2b_30190   | IGTVTSEQAGLPAEDAEEYLSKGYSPNDRVGTAYLEKQYEEVLQGQREKK <del>Q</del> INLDRNGNI | 300 |
| pbp2b_P1/7    | IGTVTSEQAGLPAEDAEEYLSKGYSPNDRVGTAYLEKQYEEVLQGQREKK <del>Q</del> INLDRNGNI | 300 |
| pbp2b_32494   | IGTVTSEQAGLPAEDAEEYLSKGYSPNDRVGTAYLEKQYEEVLQGQREKK <del>Q</del> INLDRNGNI | 300 |
| pbp2b_22715   | IGTVTSEQAGLPAEDAEEYLSKGYSPNDRVGTAYLEKQYEEVLQGQREKK <del>Q</del> INLDRNGNI | 300 |
| *****:*****.* |                                                                           |     |

|             |                                                              |     |
|-------------|--------------------------------------------------------------|-----|
| pbp2b_32098 | ESIKTIQEGQQGNNIKLTIDLAFQDGVNAILKKYFESELSTGSALYSEGVYAVALNPSTG | 360 |
| pbp2b_33329 | ESIKTIQEGQQGNNIKLTIDLAFQDGVNAILKKYFESELSTGSALYSEGVYAVALNPSTG | 360 |
| pbp2b_37647 | ESIETIQEGQQGNNIKLTIDLAFQDGVNAILKKYFESELATGSALYSEGVYAVALNPSTG | 360 |
| pbp2b_40085 | ESIETIQEGQQGNNIKLTIDLAFQDGVNAILKKYFESELATGSALYSEGVYAVALNPSTG | 360 |
| pbp2b_40484 | ESIETIQEGQQGNNIKLTIDLAFQDGVNAILKKYFESELATGSALYSEGVYAVALNPSTG | 360 |
| pbp2b_40747 | ESIETIQEGQQGNNIKLTIDLAFQDGVNAILKKYFESELATGSALYSEGVYAVALNPSTG | 360 |
| pbp2b_41126 | ESIETIQEGQQGNNIKLTIDLAFQDGVNAILKKYFESELATGSALYSEGVYAVALNPSTG | 360 |
| pbp2b_30190 | ESIETIQEGQQGNNIKLTIDLAFQDGVNAILKKYFESELATGSALYSEGVYAVALNPSTG | 360 |
| pbp2b_P1/7  | ESIETIQEGQQGNNIKLTIDLAFQDGVNAILKKYFESELATGSALYSEGVYAVALNPSTG | 360 |
| pbp2b_32494 | ESIETIQEGQQGNNIKLTIDLAFQDGVNAILKKYFESELATGSALYSEGVYAVALNPSTG | 360 |
| pbp2b_22715 | ESIETIQEGQQGNNIKLTIDLAFQDGVNAILKKYFESELATGSALYSEGVYAVALNPSTG | 360 |

\*\*\*:\*\*\*\*\*:\*\*\*\*\*:\*\*\*\*\*:\*\*\*\*\*

|             |                                                             |     |
|-------------|-------------------------------------------------------------|-----|
| pbp2b_32098 | AVLAMSGYSHEKGSSTITEDALGTITSVFTPGSIVKGATISSGWENGISGNQVLLDEPI | 420 |
| pbp2b_33329 | AVLAMSGYSHEKGSSTITEDALGTITSVFTPGSIVKGATISSGWENGISGNQVLLDEPI | 420 |
| pbp2b_37647 | AVLAMSGYSHEKGSSTITEDALGTITSVFTPGSIVKGATISSGWENGISGNQVQLDEPI | 420 |
| pbp2b_40085 | AVLAMSGYSHEKGSSTITEDALGTITSVFTPGSIVKGATISSGWENGISGNQVQLDEPI | 420 |
| pbp2b_40484 | AVLAMSGYSHEKGSSTITEDALGTITSVFTPGSIVKGATISSGWENGISGNQVQLDEPI | 420 |
| pbp2b_40747 | AVLAMSGYSHEKGSSTITEDALGTITSVFTPGSIVKGATISSGWENGISGNQVQLDEPI | 420 |
| pbp2b_41126 | AVLAMSGYSHEKGSSTITEDALGTITSVFTPGSIVKGATISSGWENGISGNQVQLDEPI | 420 |
| pbp2b_30190 | AVLAMSGYSHEKGSSTITEDALGTITSVFTPGSIVKGATISSGWENGISGNQVQLDEPI | 420 |
| pbp2b_P1/7  | AVLAMSGYSHEKGSSTITEDALGTITSVFTPGSIVKGATISSGWENGISGNQVQLDEPI | 420 |
| pbp2b_32494 | AVLAMSGYSHEKGSSTITEDALGTITSVFTPGSIVKGATISSGWENGISGNQVQLDEPI | 420 |
| pbp2b_22715 | AVLAMSGYSHEKGSSTITEDALGTITSVFTPGSIVKGATISSGWENGISGNQVQLDEPI | 420 |

\*\*\*\*\*:..:\*\*\*\*\*:\*\*\*\*\*:\*\*\*\*\*

|             |                                                               |     |
|-------------|---------------------------------------------------------------|-----|
| pbp2b_32098 | YFAGSAPITSWW--AYGSFNIDATEALEYSSNVYMKIALGLLGQTYSANMYLNDGDTLT   | 478 |
| pbp2b_33329 | YFAGSAPITSWW--AYGSFNIDATEALEYSSNVYMKIALGLLGQTYSANMYLNDGDTLT   | 478 |
| pbp2b_37647 | YFAGSAPITSWW--AYGSFNIDATEALEYSSNAVYMKIALGLLGQTYSANMYLNDGDTLT  | 478 |
| pbp2b_40085 | YFAGSAPITSWW--AYGSFNIDATEALEYSSNAVYMKIALGLLGQTYSANMYLNDGDTLT  | 478 |
| pbp2b_40484 | YFAGSAPITSWW--AYGSFNIDATEALEYSSNAVYMKIALGLLGQTYSANMYLNDGDTLT  | 478 |
| pbp2b_40747 | YFAGSAPITSWW--AYGSFNIDATEALEYSSNAVYMKIALGLLGQTYSANMYLNDGDTLT  | 478 |
| pbp2b_41126 | YFAGSAPITSWW--AYGSFNIDATEALEYSSNAVYMKIALGLLGQTYSANMYLNDGDTLT  | 478 |
| pbp2b_30190 | YFAGSAPITSWYGAYGSFNIDATEALEYSSNIYMKIALGLLGQTYSANMYLNDGDTLTK   | 480 |
| pbp2b_P1/7  | YFAGSAPITSWYG--AYGSFNIDATEALEYSSNIYMKIALGLLGQTYSANMYLNDGDTLTK | 479 |
| pbp2b_32494 | YFAGSAPITSWYG--AYGSFNIDATEALEYSSNIYMKIALGLLGQTYSANMYLNDGDTLTK | 479 |
| pbp2b_22715 | YFAGSAPITSWYG--AYGSFNIDATEALEYSSNIYMKIALGLLGQTYSANMYLNDGDTLTK | 479 |

\*\*\*\*\*:\*.\*\*\*\*\*:\*\*\*\*\*:\*\*\*\*\*

|             |                                                               |     |
|-------------|---------------------------------------------------------------|-----|
| pbp2b_32098 | NAMTKLRSTFAEYGLGASTGIDLPLESTGFLPPEEYSTANFIMNAFGQFDNYTPMQMAQYV | 538 |
| pbp2b_33329 | NAMTKLRSTFAEYGLGASTGIDLPLESTGFLPPEEYSTANFIMNAFGQFDNYTPMQMAQYV | 538 |
| pbp2b_37647 | NAMTKLRSTFAEYGLGASTGIDLPLESIGFLPPEEYSTANFITNAFGQFDNYTPMQMAQYA | 538 |
| pbp2b_40085 | NAMTKLRSTFAEYGLGASTGIDLPLESIGFLPPEEYSTANFITNAFGQFDNYTPMQMAQYA | 538 |
| pbp2b_40484 | NAMTKLRSTFAEYGLGASTGIDLPLESIGFLPPEEYSTANFITNAFGQFDNYTPMQMAQYA | 538 |
| pbp2b_40747 | NAMTKLRSTFAEYGLGASTGIDLPLESIGFLPPEEYSTANFITNAFGQFDNYTPMQMAQYA | 538 |
| pbp2b_41126 | NAMTKLRSTFAEYGLGASTGIDLPLESIGFLPPEEYSTANFITNAFGQFDNYTPMQMAQYA | 538 |
| pbp2b_30190 | NAMTKLRSTFAEYGLGASTGIDLPLESTGFLPDKYTTANFITNAFGQFDNYTPMQMAQYA  | 540 |
| pbp2b_P1/7  | NAMTKLRSTFAEYGLGASTGIDLPLESTGFLPDKYTTANFITNAFGQFDNYTPMQMAQYA  | 539 |
| pbp2b_32494 | NAMTKLRSTFAEYGLGASTGIDLPLESTGFLPDKYTTANFITNAFGQFDNYTPMQMAQYA  | 539 |
| pbp2b_22715 | NAMTKLRSTFAEYGLGASTGIDLPLESTGFLPDKYTTANFITNAFGQFDNYTPMQMAQYA  | 539 |

\*\*\*\*\*:\*\*\*:~:\*\*\*\*\*:\*\*\*\*\*:\*\*\*\*\*

|             |                                                                |     |
|-------------|----------------------------------------------------------------|-----|
| pbp2b_32098 | ATVANNGKRISPHLVEGIYGNNPQGGGLDLIETVSGKEMNQVNISADEMALLRQGFYQLV   | 598 |
| pbp2b_33329 | ATVANNGKRISPHLVEGIYGNNPQGGGLDLIETVSGKEMNQVNISADEMALLRQGFYQLV   | 598 |
| pbp2b_37647 | ATIANNGTRISPHLVEGIYGNNAQGGGLGELIETVSGKEMNQVNISAEEMSLLRQGFYQVV  | 598 |
| pbp2b_40085 | ATIANNGTRISPHLVEGIYGNNAQGGGLGELIETVSGKEMNQVNISAEEMSLLRQGFYQVV  | 598 |
| pbp2b_40484 | ATIANNGTRISPHLVEGIYGNNAQGGGLGELIETVSGKEMNQVNISAEEMSLLRQGFYQVV  | 598 |
| pbp2b_40747 | ATIANNGTRISPHLVEGIYGNNAQGGGLGELIETVSGKEMNQVNISAEEMSLLRQGFYQVV  | 598 |
| pbp2b_41126 | ATIANNGTRISPHLVEGIYGNNAQGGGLGELIETVSGKEMNQVNISAEEMSLLRQGFYQVV  | 598 |
| pbp2b_30190 | ATIANNGTRISPHLVEGIYGNNAQGGGLGELIETVSGKEMNQVNISAEEDMSLLRQGFYQVV | 600 |
| pbp2b_P1/7  | ATIANNGTRISPHLVEGIYGNNAQGGGLGELIETVSGKEMNQVNISAEEDMSLLRQGFYQVV | 599 |
| pbp2b_32494 | ATIANNGTRISPHLVEGIYGNNAQGGGLGELIETVSGKEMNQVNISAEEDMSLLRQGFYQVV | 599 |
| pbp2b_22715 | ATIANNGTRISPHLVEGIYGNNAQGGGLGELIETVSGKEMNQVNISAEEDMSLLRQGFYQVV | 599 |

\*\*\*:\*\*\*\*.\*\*\*\*\*:\*\*\*\*\*:\*\*\*\*\*:~:~:\*\*\*\*\*:~

|             |                                                               |     |
|-------------|---------------------------------------------------------------|-----|
| pbp2b_32098 | NGGGRFNTGSAIGRGAAVTISAKTGTAEYTTTTPSGEVVTAVNTNVVAYAPSDNPQIAVA  | 658 |
| pbp2b_33329 | NGGGRFNTGSAIGRGAAVTISAKTGTAEYTTTTPSGEVVTAVNTNVVAYAPSDNPQIAVA  | 658 |
| pbp2b_37647 | NGSGRFNTGSAIGRGAAVTISAKTGRAETYTTTTASGDVVTAVNTNVVAYAPSDNPQIAVA | 658 |
| pbp2b_40085 | NGSGRFNTGSAIGRGAAVTISAKTGRAETYTTTTASGDVVTAVNTNVVAYAPSDNPQIAVA | 658 |
| pbp2b_40484 | NGSGRFNTGSAIGRGAAVTISAKTGRAETYTTTTASGDVVTAVNTNVVAYAPSDNPQIAVA | 658 |
| pbp2b_40747 | NGSGRFNTGSAIGRGAAVTISAKTGRAETYTTTTASGDVVTAVNTNVVAYAPSDNPQIAVA | 658 |
| pbp2b_41126 | NGSGRFNTGSAIGRGAAVTISAKTGRAETYTTTTASGDVVTAVNTNVVAYAPSDNPQIAVA | 658 |
| pbp2b_30190 | NGSGRFNTGSAIGRGAAVTISAKTGTAEYTTTTASGDMVTAINTNVVAYAPSDNPQIAVA  | 660 |
| pbp2b_P1/7  | NGSGRFNTGSAIGRGAAVTISAKTGTAEYTTTTASGDVVTAVNTNVVAYAPSDNPQIAVA  | 659 |
| pbp2b_32494 | NGSGRFNTGSAIGRGAAVTISAKTGTAEYTTTTASGDVVTAVNTNVVAYAPSDNPQIAVA  | 659 |
| pbp2b_22715 | NGSGRFNTGSAIGRGAAVTISAKTGTAEYTTTTASGDVVTAINTNVVAYAPSDNPQIAVV  | 659 |

\*\*.\*\*\*\*\*.\*\*\*\*\* \*\*::\*\*\*:\*\*\*\*\*.\*\*\*\*\*.

|             |                                  |     |
|-------------|----------------------------------|-----|
| pbp2b_32098 | VVLPNLTNENST-TKAITTEIINLYNSLYPMN | 689 |
| pbp2b_33329 | VVLPNLTNENST-TKAITTEIINLYNSLYPMN | 689 |
| pbp2b_37647 | VVLPNLTNQSSTTTNTITQEIINLYQSLHPMN | 690 |
| pbp2b_40085 | VVLPNLTNQSSTTTNTITQEIINLYQSLHPMN | 690 |
| pbp2b_40484 | VVLPNLTNQSSTTTNTITQEIINLYQSLHPMN | 690 |
| pbp2b_40747 | VVLPNLTNQSSTTTNTITQEIINLYQSLHPMN | 690 |
| pbp2b_41126 | VVLPNLTNQSSTTTNTITQEIINLYQSLHPMN | 690 |
| pbp2b_30190 | VVLPNLTNQSSTTTKTITQEIINLYQSLHPMN | 692 |
| pbp2b_P1/7  | VVLPNLTNQSSTTTKTITQEIINLYQSLHPMN | 691 |
| pbp2b_32494 | VVLPNLTNQSSTTTKTITQEIINLYQSLHPMN | 691 |
| pbp2b_22715 | VVLPNLTNQSSTTTKTITQEIINLYQSLHPMN | 691 |

\*\*\*\*\*:.\* \*\*::\*\* \*\*\*\*\*:\*\*\*:\*\*\*
