# Supplementary material for: Non-Penicillin-Susceptible Streptococcus suis Isolated from Humans
Source: MDPI journal article supplement (doi:10.3390/pathogens10091178), 2021-09-13
Supplement: s1 [file s1]

**Table S3** PCR primers for detection of tetracycline and macrolide resistance genes.

| Primer               | Targeted gene     | Sequences (5'-3')     | Annealing temperature (°C) | Amplicon size (bp) |
|----------------------|-------------------|-----------------------|----------------------------|--------------------|
| <i>tetA</i> -FW      | <i>tetA</i>       | GCGCGATCTGGTTCACCTCG  | 61                         | 164                |
| <i>tetA</i> -RV      |                   | AGTCGACAGYRGC GCCGGC  |                            |                    |
| <i>tetB</i> -FW      | <i>tetB</i>       | TACGTGAATTTATTGCTTCGG | 59                         | 206                |
| <i>tetB</i> -RV      |                   | ATACAGCATCCAAAGCGCAC  |                            |                    |
| <i>tetC</i> -FW      | <i>tetC</i>       | GCGGGATATCGTCCATTCCG  | 68                         | 207                |
| <i>tetC</i> -RV      |                   | GCGTAGAGGATCCACAGGACG |                            |                    |
| <i>tetD</i> -FW      | <i>tetD</i>       | GGAATATCTCCCGGAAGCGG  | 68                         | 187                |
| <i>tetD</i> -RV      |                   | CACATTGGACAGTGCCAGCAG |                            |                    |
| <i>tetE</i> -FW      | <i>tetE</i>       | GTTATTACGGGAGTTTGTG   | 61                         | 199                |
| <i>tetE</i> -RV      |                   | AATACAACACCCACACTACGC |                            |                    |
| <i>tetG</i> -FW      | <i>tetG</i>       | GCAGAGCAGGTCGCTGG     | 65                         | 134                |
| <i>tetG</i> -RV      |                   | CCYGCAAGAGAAGCCAGAAG  |                            |                    |
| <i>tetH</i> -FW      | <i>tetH</i>       | CAGTGAATAATTCAGTGCAAC | 61                         | 185                |
| <i>tetH</i> -RV      |                   | ATCCAAAGTGTGGTTGAGAAT |                            |                    |
| <i>tetJ</i> -FW      | <i>tetJ</i>       | CGAAAACAGACTCGCCAATC  | 61                         | 184                |
| <i>tetJ</i> -RV      |                   | TCCATAATGAGGTGGGGC    |                            |                    |
| <i>tetK</i> -FW      | <i>tetK</i>       | TCGATAGGAACAGCAGTA    | 55                         | 169                |
| <i>tetK</i> -RV      |                   | CAGCAGATCCTACTCCTT    |                            |                    |
| <i>tetL</i> -FW      | <i>tetL</i>       | TCGTTAGCGTGCTGTCATTC  | 55                         | 267                |
| <i>tetL</i> -RV      |                   | GTATCCCACCAATGTAGCCG  |                            |                    |
| <i>tetV</i> -FW      | <i>tetV</i>       | GCCTACGGTTTCATCCTGGC  | 65                         | 351                |
| <i>tetV</i> -RV      |                   | CGAGACCACCTTCGACAGCG  |                            |                    |
| <i>tetY</i> -FW      | <i>tetY</i>       | ATTTGTACCGGCAGAGCAAAC | 68                         | 181                |
| <i>tetY</i> -RV      |                   | GGCGCTGCCGCCATTATGC   |                            |                    |
| <i>tetZ</i> -FW      | <i>tetZ</i>       | CCTTCTCGACCAGGTCGG    | 61                         | 204                |
| <i>tetZ</i> -RV      |                   | ACCCACAGCGTGTCCGTC    |                            |                    |
| <i>tetA</i> (P)-FW   | <i>tetA</i> (P)   | CTTGATTGCGGAAGAAGAG   | 55                         | 676                |
| <i>tetA</i> (P)-RV   |                   | ATATGCCCATTTAACCACGC  |                            |                    |
| <i>tet30</i> -FW     | <i>tet30</i>      | CATCTTGGTCGAGGTGACTGG | 68                         | 210                |
| <i>tet30</i> -RV     |                   | ACGAGCACCCAGCCGAGC    |                            |                    |
| <i>tet31</i> -FW     | <i>tet31</i>      | CAATCACGCCCAAAAGAA    | 53                         | 564                |
| <i>tet31</i> -RV     |                   | TGTGCCATCCAGTTTGT     |                            |                    |
| <i>tet33</i> -FW     | <i>tet33</i>      | ATGCGGTTCCGCTGAA      | 54                         | 784                |
| <i>tet33</i> -RV     |                   | GGAAAATGCGTCAGTGACAA  |                            |                    |
| <i>tet35</i> -FW     | <i>tet35</i>      | ATGCGCAAGACCGTCCTAC   | 54                         |                    |
| <i>tet35</i> -RV     |                   | CACACACTAGTAACGGTCGAA |                            |                    |
| <i>tet38</i> -FW     | <i>tet38</i>      | ATGAATGTTGAATATTCTAA  | 42                         | 106                |
| <i>tet38</i> -RV     |                   | TGGCTACAGAAATCAAT     |                            |                    |
| <i>tet39</i> -FW     | <i>tet39</i>      | CTCCTTCTCTATTGTGGCTA  | 47                         | 701                |
| <i>tet39</i> -RV     |                   | CACTAATACCTCTGGACATCA |                            |                    |
| <i>tet40</i> -FW     | <i>tet40</i>      | CGGAGGAAGAGGACAAACCC  | 56                         | 446                |
| <i>tet40</i> -RV     |                   | TAAGCCGCTGCCGATAAGAC  |                            |                    |
| <i>tet41</i> -FW     | <i>tet41</i>      | AATGCGATCAATTTCCGCCG  | 55                         | 166                |
| <i>tet41</i> -RV     |                   | CGGCGAACAGCAGATTAACG  |                            |                    |
| <i>tet42</i> -FW     | <i>tet42</i>      | TCTCGAGGATCACGAACCT   | 55                         | 128                |
| <i>tet42</i> -RV     |                   | ACTGGGACTCGATACACCA   |                            |                    |
| <i>tet45</i> -FW     | <i>tet45</i>      | GCTGAGCCATCCACTCATTT  | 63                         | 107                |
| <i>tet45</i> -RV     |                   | TTTCTCTTGAGCGTTTATGC  |                            |                    |
| <i>tetAB</i> (46)-FW | <i>tetAB</i> (46) | GCTTCTTGGACCTTGACGGA  | 55                         | 580                |

|                      |                 |                                           |      |      |
|----------------------|-----------------|-------------------------------------------|------|------|
| <i>tetAB(46)</i> -RV |                 | G TTCCTGACTCATGGCCACA                     |      |      |
| <i>tet47</i> -FW     | <i>tet47</i>    | GCGTTTGGCGTGGGTTTAAT                      | 55   | 627  |
| <i>tet47</i> -RV     |                 | GACCCCTGTGGCATTGGTTA                      |      |      |
| <i>tcr3</i> -FW      | <i>tcr3</i>     | CGCTCAGTTCGACAAGACCT                      | 54   | 399  |
| <i>tcr3</i> -RV      |                 | GTCTCCATCGAGTTCGCCAT                      |      |      |
| <i>otrB</i> -FW      | <i>otrB</i>     | CCGACATCTACGGGCGCAAGC                     | 55   | 947  |
| <i>otrB</i> -RV      |                 | GGTGATGACGGTCTGGGACAG                     |      |      |
| <i>otrC</i> -FW      | <i>otrC</i>     | ATGAAGTTCGCGCCAATGNA                      | 55   | 1860 |
| <i>otrC</i> -RV      |                 | TCAGGTCTTCTTGCGGAAGTT                     |      |      |
| <i>tetQ</i> -FW      | <i>tetQ</i>     | AGAATCTGCTGTTTGCCAGTG                     | 56   | 169  |
| <i>tetQ</i> -RV      |                 | CGGAGTGTCAATGATATTGCA                     |      |      |
| <i>tetT</i> -FW      | <i>tetT</i>     | AAGGTTTATTATATAAAAGTG                     | 46   | 169  |
| <i>tetT</i> -RV      |                 | AGGTGTATCTATGATATTTAC                     |      |      |
| <i>tetB(P)</i> -FW   | <i>tetB(P)</i>  | AAAACCTTATTATATTATAGTG                    | 46   | 169  |
| <i>tetB(P)</i> -RV   |                 | TGGAGTATCAATAATATTAC                      |      |      |
| <i>tet32</i> -FW     | <i>tet32</i>    | GAACCAGATGCTGCTCTT                        | 57   | 620  |
| <i>tet32</i> -RV     |                 | CATAGCCACGCCACATGAT                       |      |      |
| <i>tet36</i> -FW     | <i>tet36</i>    | TTTCTGGCAGAGGTAGAACG                      | 57   | 250  |
| <i>tet36</i> -RV     |                 | TTAATTCCTTGCCTTCAACG                      |      |      |
| <i>tet44</i> -FW     | <i>tet44</i>    | AAAATAATCAACATTGGTATTCTTGCTCA             | 56   | 1927 |
| <i>tet44</i> -RV     |                 | TAGTAACTTAATTTTCTTTTTTATTAAACA<br>TATGGCG |      |      |
| <i>otrA</i> -FW      | <i>otrA</i>     | GAACACGTACTGACCGAGAAG                     | 55   | 778  |
| <i>otrA</i> -RV      |                 | CAGAAGTAGTTGTGCGTCCG                      |      |      |
| <i>tetX</i> -FW      | <i>tetX</i>     | GAAAGAGACAACGACCGAGAG                     | 56.5 | 131  |
| <i>tetX</i> -RV      |                 | ACACCCATTGGTAAGGCTAAG                     |      |      |
| <i>tet34</i> -FW     | <i>tet34</i>    | ATACGGGGATGCAAACTTCA                      | 53   | 729  |
| <i>tet34</i> -RV     |                 | ACGAGTGAGCTCTGATGTCTCTT                   |      |      |
| <i>tet37</i> -FW     | <i>tet37</i>    | ATGGTTCGCTATTACTCTAAC                     | 45   | 177  |
| <i>tet37</i> -RV     |                 | ATCAGTCTCATATTTCGACA                      |      |      |
| <i>tetU</i> -FW      | <i>tetU</i>     | ATGCAGCTAAGACGTGGC                        | 54   | 317  |
| <i>tetU</i> -RV      |                 | TTATTCGGTATCACTTCTCTGTC                   |      |      |
| <i>erm(B)</i> -F     | <i>erm(B)</i>   | TGGTATTCCAAATGCGTAATG                     | 62   | 745  |
| <i>erm(B)</i> -R     |                 | CTGTGGTATGGCGGGTAAGT                      |      |      |
| <i>mef(A/E)</i> -F   | <i>mef(A/E)</i> | CAATATGGGCAGGGCAAG                        | 62   | 317  |
| <i>mef(A/E)</i> -R   |                 | AAGCTGTTCCAATGCTACGG                      |      |      |
| <i>msr(D)</i> -F     | <i>msr(D)</i>   | TTGGACGAAGTAACTCTG                        | 50   | 370  |
| <i>msr(D)</i> -R     |                 | GCTTGGCTCTTACGTTT                         |      |      |
