# Supplementary material for: Non-Penicillin-Susceptible Streptococcus suis Isolated from Humans
Source: MDPI journal article supplement (doi:10.3390/pathogens10091178), 2021-09-13
Supplement: s1 [file s1]

## Alignment of pbp2X sequence

|             |                                                                                                                                             |     |
|-------------|---------------------------------------------------------------------------------------------------------------------------------------------|-----|
| pbp2x_32098 | MPRRNNKLLRYVLKKRYVPSKNRRRVGQSLLLLTVFVFFLFLINFAYIIIGTDSKFGVDLS                                                                               | 60  |
| pbp2x_33329 | MPRRNNKLLRYVLKKRYVPSKNRRRVGQSLLLLTVFVFFLFLINFAYIIIGTDSKFGVDLS                                                                               | 60  |
| pbp2x_30190 | MPRRNNKLLRYVLKKRYVPSKNRRRVGQSLLLLTVFVFFLFLINFAYIIIGTDSKFGVDLS                                                                               | 60  |
| pbp2x_32494 | MPRRNNKLLRYVLKKRYVPSKNRRRVGQSLLLLTVFVFFLFLINFAYIIIGTDSKFGVDLS                                                                               | 60  |
| pbp2x_P1-7  | MPRRNNKLLRYVLKKRYVPSKNRRRVGQSLLLLTVFVFFLFLINFAYIIIGTDSKFGVDLS                                                                               | 60  |
| pbp2x_37647 | MPRRNNKLLRYVLKKRYIPSKNRRRVGQSLLLLTVFVFFLFLINFAYIIIGTDSKFGVDLS                                                                               | 60  |
| pbp2x_40085 | MPRRNNKLLRYVLKKRYIPSKNRRRVGQSLLLLTVFVFFLFLINFAYIIIGTDSKFGVDLS                                                                               | 60  |
| pbp2x_41126 | MPRRNNKLLRYVLKKRYIPSKNRRRVGQSLLLLTVFVFFLFLINFAYIIIGTDSKFGVDLS                                                                               | 60  |
| pbp2x_22715 | MPRRNNKLLRYVLKKRYVPSKNRRRVGQSLLLLTVFVFFLFLINFAYIIIGTDSKFGVDLS                                                                               | 60  |
| pbp2x_40484 | MPRRNNKLLRYVLKKRYVPSKNRRRVGQSLLLLTVFVFFLFLINFAYIIIGTDSKFGVDLS                                                                               | 60  |
| pbp2x_40747 | MPRRNNKLLRYVLKKRYVPSKNRRRVGQSLLLLTVFVFFLFLINFAYIIIGTDSKFGVDLS<br>*****:*****                                                                | 60  |
|             |                                                                                                                                             |     |
| pbp2x_32098 | ERADAVHQREVTVQAKRGTIYDRTGIPIAEDSTTYTVYAIIDTEYVSELKKVLYVQSSQF                                                                                | 120 |
| pbp2x_33329 | ERADAVHQREVTVQAKRGTIYDRTGIPIAEDSTTYTVYAIIDTEYVSELKKVLYVQSSQF                                                                                | 120 |
| pbp2x_30190 | ERADAVHQREVTVQAKRGTIYDRTGIPIAEDSTTYTVYAIIDTEYVSELKKVLYVQSSQF                                                                                | 120 |
| pbp2x_32494 | ERADAVHQREVIVQAKRGTIYDRTGIPIAEDSTTYTVYAIIDTEYVSELKKVLYVQSSQF                                                                                | 120 |
| pbp2x_P1-7  | ERADAVHQREVIVQAKRGTIYDRTGIPIAEDSTTYTVYAIIDTEYVSELKKVLYVQSSQF                                                                                | 120 |
| pbp2x_37647 | ERADAVHQREVTVQAKRGTIYDRTGIPIAEDSTTYTVYAIIDTEYVSELKKVLYVQSSQF                                                                                | 120 |
| pbp2x_40085 | ERADAVHQREVTVQAKRGTIYDRTGIPIAEDSTTYTVYAIIDTEYVSELKKVLYVQSSQF                                                                                | 120 |
| pbp2x_41126 | ERADAVHQREVTVQAKRGTIYDRTGIPIAEDSTTYTVYAIIDTEYVSELKKVLYVQSSQF                                                                                | 120 |
| pbp2x_22715 | ERADAVHQREVTVQAKRGTIYDRTGIPIAEDSTTYTVYAIIDTEYVSEFQEILYVSSQF                                                                                 | 120 |
| pbp2x_40484 | ERADAVHQREVTVQAKRGTIYDRTGIPIAEDSTTYTVYAIIDTEYVSEFQEILYVSSQF                                                                                 | 120 |
| pbp2x_40747 | ERADAVHQREVTVQAKRGTIYDRTGIPIAEDSTTYTVYAIIDTEYVSEFQEILYVSSQF<br>***** *****: : : * : * : *                                                   | 120 |
|             |                                                                                                                                             |     |
| pbp2x_32098 | SKVAEIFKKHLGMETAYVMEQLNQPELQVYFGLGKNISYSTMSIQEEMKAAGIEGIA                                                                                   | 180 |
| pbp2x_33329 | SKVAEIFKKHLGMETAYVMEQLNQPELQVYFGLGKNISYSTMSIQEEMKAAGIEGIA                                                                                   | 180 |
| pbp2x_30190 | SKVAEIFKKHLGMETAYVMEQLNQPELQVYFGLGKNISYSTMSIQEEMKAAGIEGIA                                                                                   | 180 |
| pbp2x_32494 | SKVAEIFKKHLGMETDYVMEQLNQPELQVYFGLGKNISYSTMSIQEEMKAAGIEGIA                                                                                   | 180 |
| pbp2x_P1-7  | SKVAEIFKKHLGMETDYVMEQLNQPELQVYFGLGKNISYSTMSIQEEMKAAGIEGIA                                                                                   | 180 |
| pbp2x_37647 | SKVAEIFKKHLGMETDYVMEQLNQPELQVYFGLGKNISYSTMSIQEEMKAAGIEGIA                                                                                   | 180 |
| pbp2x_40085 | SKVAEIFKKHLGMETDYVMEQLNQPELQVYFGLGKNISYSTMSIQEEMKAAGIEGIA                                                                                   | 180 |
| pbp2x_41126 | SKVAEIFKKHLGMETDYVMEQLNQPELQVYFGLGKNISYSTMSIQEEMKAAGIEGIA                                                                                   | 180 |
| pbp2x_22715 | HKVADILNKYLGMETDYVNKQLNQPELQVYFGLGKNISYSTMTSIQEEMKAAGIKGIA                                                                                  | 180 |
| pbp2x_40484 | HKVADILNKYLGMETDYVNKQLNQPELQVYFGLGKNISYSTMTSIQEEMKAAGIKGIA                                                                                  | 180 |
| pbp2x_40747 | HKVADILNKYLGMETDYVNKQLNQPELQVYFGLGKNISYSTMTSIQEEMKAAGIKGIA<br>* : * : * : * : * : * : * : * : * : * : * : * : * : * : * : * : * : * : * : * | 180 |
|             |                                                                                                                                             |     |
| pbp2x_32098 | FNASPGRMYPNGNFSISFVGLANPVENKDGSHSLQGVSGLYYLNDILAGQDGKVIYEKD                                                                                 | 240 |
| pbp2x_33329 | FNASPGRMYPNGNFSISFVGLANPVENKDGSHSLQGVSGLYYLNDILAGQDGKVIYEKD                                                                                 | 240 |
| pbp2x_30190 | FNASPGRMYPNGNFASIFVGLANPVENKDGSHSLQGVSGLYYLNDILAGQDGKVIYEKD                                                                                 | 240 |
| pbp2x_32494 | FNASPGRMYPNGNFASIFVGLANLVENKDGSHSLQGVSGLYYLNDILAGQDGKVIYEKD                                                                                 | 240 |
| pbp2x_P1-7  | FNASPGRMYPNGNFASIFVGLANLVENKDGSHSLQGVSGLYYLNDILAGQDGKVIYEKD                                                                                 | 240 |
| pbp2x_37647 | FDASPGRMYSNGNFASIFVGLANPVENKDGSHSLQGVSGLYYLNDILAGQDGKVIYEKD                                                                                 | 240 |
| pbp2x_40085 | FDASPGRMYSNGNFASIFVGLANPVENKDGSHSLQGVSGLYYLNDILAGQDGKVIYEKD                                                                                 | 240 |
| pbp2x_41126 | FDASPGRMYSNGNFASIFVGLANPVENKDGSHSLQGVSGLYYLNDILAGQDGKVIYEKD                                                                                 | 240 |
| pbp2x_22715 | FNASPGRMYPNGNFASIFVGLANLIENKDGSHSLQGMSEYLLNDILAGQDGKVIYEKD                                                                                  | 240 |
| pbp2x_40484 | FNASPGRMYPNGNFASIFVGLANLIENKDGSHSLQGMSEYLLNDILAGQDGKVIYEKD                                                                                  | 240 |
| pbp2x_40747 | FNASPGRMYPNGNFASIFVGLANLIENKDGSHSLQGMSEYLLNDILAGQDGKVIYEKD<br>* : * : * : * : * : * : * : * : * : * : * : * : * : * : * : * : * : * : *     | 240 |



|             |                                                      |             |              |                 |        |     |
|-------------|------------------------------------------------------|-------------|--------------|-----------------|--------|-----|
| pbp2x_32098 | DGYDIAVKSGSAEIAS                                     | EDGQGYIKGAY | TNSVVAMIPAEN | PEFIMYVTIRQPEVL | SVLSWD | 600 |
| pbp2x_33329 | DGYDIAVKSGSAEIAS                                     | EDGQGYIKGAY | TNSVVAMIPAEN | PEFIMYVTIRQPEVL | SVLSWD | 600 |
| pbp2x_30190 | DGYDIAVKSGTAEIAS                                     | EDGQGYIKGAY | INSVVAMIPAED | PEFIMYVTIRQPEVL | NVLSWR | 600 |
| pbp2x_32494 | DGYDIAVKSGTAEIAS                                     | EDGQGYIKGAY | INSVVAMIPAED | PEFIMYVTIRQPEVL | NVLSWR | 600 |
| pbp2x_P1-7  | DGYDIAVKSGTAEIAS                                     | EDGQGYIKGAY | INSVVAMIPAED | PEFIMYVTIRQPEVL | NVLSWR | 600 |
| pbp2x_37647 | DGYDIAVKSGSAEIAS                                     | EDGQGYIKGAY | TNSVVAMIPAED | PEFIMYVTIRQPEVL | NVLSWR | 600 |
| pbp2x_40085 | DGYDIAVKSGSAEIAS                                     | EDGQGYIKGAY | TNSVVAMIPAED | PEFIMYVTIRQPEVL | NVLSWR | 600 |
| pbp2x_41126 | DGYDIAVKSGSAEIAS                                     | EDGQGYIKGAY | TNSVVAMIPAED | PEFIMYVTIRQPEVL | NVLSWR | 600 |
| pbp2x_22715 | EGYDIAMKSGSAEIAS                                     | EDGLGYIKDAY | TNSVVAMIPAED | PEFIMYVTIRQPEVL | SVLSWN | 600 |
| pbp2x_40484 | EGYDIAMKSGSAEIAS                                     | EDGLGYIKDAY | TNSVVAMIPAED | PEFIMYVTIRQPEVL | NVLSWR | 600 |
| pbp2x_40747 | EGYDIAMKSGSAEIAS                                     | EDGLGYIKDAY | TNSVVAMIPAED | PEFIMYVTIRQPEVL | NVLSWR | 600 |
|             | :*****:***:****.*** *****. ** *****:*****:*****.**** |             |              |                 |        |     |

|             |                                               |                 |                     |                 |                 |        |     |
|-------------|-----------------------------------------------|-----------------|---------------------|-----------------|-----------------|--------|-----|
| pbp2x_32098 | SIISPTLKEAMLLKDNLNLD                          | APAPSLTYVEKETDY | KLPDLIGKAPGESAEELRR | QLVQPV          | 660             |        |     |
| pbp2x_33329 | SIISPTLKEAMLLKDNLNLD                          | APAPSLTYVEKETDY | KLPDLIGKAPGESAEELRR | QLVQPV          | 660             |        |     |
| pbp2x_30190 | DIVSPTLKEAMLLKDNLNLD                          | SAPALARVANET    | EYQLPD              | LIGKAPGESAEELRR | QLVQPV          | 660    |     |
| pbp2x_32494 | DIVSPTLKEAMLLKDNLNLD                          | SAPALARVANET    | EYQLPD              | LIGKAPGESAEELRR | QLVQPV          | 660    |     |
| pbp2x_P1-7  | DIVSPTLKEAMLLKDNLNLD                          | SAPALARVANET    | EYQLPD              | LIGKAPGESAEELRR | QLVQPV          | 660    |     |
| pbp2x_37647 | DIVSPTLKEAMLLKDNLNLD                          | SAPALAQVANET    | EYQLPD              | LIGKAPGESAEELRR | QLVQPV          | 660    |     |
| pbp2x_40085 | DIVSPTLKEAMLLKDNLNLD                          | SAPALAQVANET    | EYQLPD              | LIGKAPGESAEELRR | QLVQPV          | 660    |     |
| pbp2x_41126 | DIVSPTLKEAMLLKDNLNLD                          | SAPALAQVANET    | EYQLPD              | LIGKAPGESAEELRR | QLVQPV          | 660    |     |
| pbp2x_22715 | TIVSPTLKEAMLLKDNLNLD                          | PASNL           | SLLTNETEY           | KLPD            | IVGKAPGEIAEELRR | NLVQPV | 660 |
| pbp2x_40484 | DIVSPTLKEAMLLKDNLNLD                          | SAPALAQVANET    | EYQLPD              | LIGKAPGESAEELRR | QLVQPV          | 660    |     |
| pbp2x_40747 | DIVSPTLKEAMLLKDNLNLD                          | SAPALAQVANET    | EYQLPD              | LIGKAPGESAEELRR | QLVQPV          | 660    |     |
|             | *:***** ***** *: : **:*:***:***** *****:***** |                 |                     |                 |                 |        |     |

|             |                                                   |             |               |           |           |               |     |
|-------------|---------------------------------------------------|-------------|---------------|-----------|-----------|---------------|-----|
| pbp2x_32098 | ILGNGAIEIKKV                                      | SVEKGSNV    | IANQQVLLLT    | TKFEEMPDL | YAITKENMD | IFAEWTGIEVTYK | 720 |
| pbp2x_33329 | ILGNGAIEIKKV                                      | SVEKGSNV    | IANQQVLLLT    | TKFEEMPDL | YAITKENMD | IFAEWTGIEVTYK | 720 |
| pbp2x_30190 | ILGNGAIEIKKV                                      | SVEKGS      | SKVIANQQVLLLT | TKFEEMPDL | YAITKENMD | IFAEWTGIEVTYK | 720 |
| pbp2x_32494 | ILGNGAIEIKKV                                      | SVEKGS      | SKVIANQQVLLLT | TKFEEMPDL | YAITKENMD | IFAEWTGIEVTYK | 720 |
| pbp2x_P1-7  | ILGNGAIEIKKV                                      | SVEKGS      | SKVIANQQVLLLT | TKFEEMPDL | YAITKENMD | IFAEWTGIEVTYK | 720 |
| pbp2x_37647 | ILGNGAIEIKKV                                      | SVEKGSNV    | IANQQVLLLT    | TKFEEMPDL | YAITKENMD | IFAEWTGIEVTYK | 720 |
| pbp2x_40085 | ILGNGAIEIKKV                                      | SVEKGSNV    | IANQQVLLLT    | TKFEEMPDL | YAITKENMD | IFAEWTGIEVTYK | 720 |
| pbp2x_41126 | ILGNGAIEIKKV                                      | SVEKGSNV    | IANQQVLLLT    | TKFEEMPDL | YAITKENMD | IFAEWTGIEVTYK | 720 |
| pbp2x_22715 | ILGN                                              | SEIKQASVEKG | TAVSANQQVLLLT | TKFEEMPDL | YAVTKENMD | LIAEWTGIEVTY  | 720 |
| pbp2x_40484 | ILGNGAIEIKKV                                      | SVEKGSNV    | IANQQVLLLT    | TKFEEMPDL | YAITKENMD | IFAEWTGIEVTYK | 720 |
| pbp2x_40747 | ILGNGAIEIKKV                                      | SVEKGSNV    | IANQQVLLLT    | TKFEEMPDL | YAITKENMD | IFAEWTGIEVTYK | 720 |
|             | *****:***:*****: * *****:*****:*****:*****:*****: |             |               |           |           |               |     |

|             |                              |             |             |           |     |
|-------------|------------------------------|-------------|-------------|-----------|-----|
| pbp2x_32098 | GTGSKVVDQ                    | SVEVGTALNKT | KKITITLGD   | 749       |     |
| pbp2x_33329 | GTGSKVVDQ                    | SVEVGTALNKT | KKITITLGD   | 749       |     |
| pbp2x_30190 | GTGSKVVDQ                    | SVEVGTALNKT | KKITITLGD   | 749       |     |
| pbp2x_32494 | GTGSKVVDQ                    | SVEVGTALNKT | KKITITLGD   | 749       |     |
| pbp2x_P1-7  | GTGSKVVDQ                    | SVEVGTALNKT | KKITITLGD   | 749       |     |
| pbp2x_37647 | GTGSKVVDQ                    | SVEVGTALNKT | EKITITLGD   | 749       |     |
| pbp2x_40085 | GTGSKVVDQ                    | SVEVGTALNKT | EKITITLGD   | 749       |     |
| pbp2x_41126 | GTGSKVVDQ                    | SVEVGTALNKT | EKITITLGD   | 749       |     |
| pbp2x_22715 | GQGA                         | KVIDQ       | SVEVGTALNKT | KNITVTLGD | 749 |
| pbp2x_40484 | GTGSKVVDQ                    | SVEVGTALNKT | EKITITLGD   | 749       |     |
| pbp2x_40747 | GTGSKVVDQ                    | SVEVGTALNKT | EKITITLGD   | 749       |     |
|             | * *:***:***** *****:***:**** |             |             |           |     |
