# Supplementary material for: Non-Penicillin-Susceptible Streptococcus suis Isolated from Humans
Source: MDPI journal article supplement (doi:10.3390/pathogens10091178), 2021-09-13
Supplement: s1 [file s1]

# Alignment of pbp1A sequence

|             |                                                                 |     |
|-------------|-----------------------------------------------------------------|-----|
| pbp1a_32098 | MVNLLKTTTIKKALLITANILLAGAI IACLAGAALVVYYIQSAPELTEESLTATVSSKIY   | 60  |
| pbp1a_33329 | MVNLLKTTTIKKALLITANILLAGAI IACLAGAALVVYYIQSAPELTEESLTATVSSKIY   | 60  |
| pbp1a_22715 | MVNLLKTTTIKKALLITANILLAGAI IACLAGAALVVYYIQSAPELTEESLTATVSSKIY   | 60  |
| pbp1a_37647 | MVNLLKTTTIKKALLITANILLAGAI IACLAGAALVVYYIQSAPELTEESLTATVSSKIY   | 60  |
| pbp1a_40085 | MVNLLKTTTIKKALLITANILLAGAI IACLAGAALVVYYIQSAPELTEESLTATVSSKIY   | 60  |
| pbp1a_40484 | MVNLLKTTTIKKALLITANILLAGAI IACLAGAALVVYYIQSAPELTEESLTATVSSKIY   | 60  |
| pbp1a_40747 | MVNLLKTTTIKKALLITANILLAGAI IACLAGAALVVYYIQSAPELTEESLTATVSSKIY   | 60  |
| pbp1a_41126 | MVNLLKTTTIKKALLITANILLAGAI IACLAGAALVVYYIQSAPELTEESLTATVSSKIY   | 60  |
| pbp1a_30190 | MVNLLKTTTIKKALLITANILLAGAI IACLAGAALVVYYIQSAPELTEESLTATVSSKIY   | 60  |
| pbp1a_32494 | MVNLLKTTTIKKALLITANILLAGAI IACLAGAALVVYYIQSAPELTEESLTATVSSKIY   | 60  |
| pbp1a_P1/7  | MVNLLKTTTIKKALLITANILLAGAI IACLAGAALVVYYIQSAPELTEESLTATVSSKIY   | 60  |
| *****       |                                                                 |     |
| pbp1a_32098 | DKNGNLIADLGAEKRSSAKTEEIP TDLVNAIVAIEDQRFFNHRGVDVIRIAGSLINNLSG   | 120 |
| pbp1a_33329 | DKNGNLIADLGAEKRSSAKTEEIP TDLVNAIVAIEDQRFFNHRGVDVIRIAGSLINNLSG   | 120 |
| pbp1a_22715 | DKNGNLIADLGAEKRSSAKTEEIP TDLVNAIVAIEDQRFFNHRGVDVIRIAGSLINNLSG   | 120 |
| pbp1a_37647 | DKNGNLIADLGAEKRSSAKTEEIP TDLVNAIVAIEDQRFFNHRGVDVIRIAGSLINNLSG   | 120 |
| pbp1a_40085 | DKNGNLIADLGAEKRSSAKTEEIP TDLVNAIVAIEDQRFFNHRGVDVIRIAGSLINNLSG   | 120 |
| pbp1a_40484 | DKNGNLIADLGAEKRSSAKTEEIP TDLVNAIVAIEDQRFFNHRGVDVIRIAGSLINNLSG   | 120 |
| pbp1a_40747 | DKNGNLIADLGAEKRSSAKTEEIP TDLVNAIVAIEDQRFFNHRGVDVIRIAGSLINNLSG   | 120 |
| pbp1a_41126 | DKNGNLIADLGAEKRSSAKTEEIP TDLVNAIVAIEDQRFFNHRGVDVIRIAGSLINNLSG   | 120 |
| pbp1a_30190 | DKNGNLIADLGAEKRSSAKTEEIP TDLVNAIVAIEDQRFFNHRGVDVIRIAGSLINNLSG   | 120 |
| pbp1a_32494 | DKNGNLIADLGAEKRSSAKTEEIP TDLVNAIVAIEDQRFFNHRGVDVIRIAGSLINNLSG   | 120 |
| pbp1a_P1/7  | DKNGNLIADLGAEKRSSAKTEEIP TDLVNAIVAIEDQRFFNHRGVDVIRIAGSLINNLSG   | 120 |
| *****       |                                                                 |     |
| pbp1a_32098 | GRLQGGSTLDQQFIKLT YFSTSVEDQNLKRKIQEAWLATQLERRNTKQEILTYYINKVYM   | 180 |
| pbp1a_33329 | GRLQGGSTLDQQFIKLT YFSTSVEDQNLKRKIQEAWLATQLERRNTKQEILTYYINKVYM   | 180 |
| pbp1a_22715 | GRLQGGSTLDQQFIKLT YFSTSVEDQNLKRKIQEAWLATQLERRNTKQEILTYYINKVYM   | 180 |
| pbp1a_37647 | GRLQGGSTLDQQFIKLT YFSTSVEDQNLKRKIQEAWLATQLERRNTKQEILTYYINKVYM   | 180 |
| pbp1a_40085 | GRLQGGSTLDQQFIKLT YFSTSVEDQNLKRKIQEAWLATQLERRNTKQEILTYYINKVYM   | 180 |
| pbp1a_40484 | GRLQGGSTLDQQFIKLT YFSTSVEDQNLKRKIQEAWLATQLERRNTKQEILTYYINKVYM   | 180 |
| pbp1a_40747 | GRLQGGSTLDQQFIKLT YFSTSVEDQNLKRKIQEAWLATQLERRNTKQEILTYYINKVYM   | 180 |
| pbp1a_41126 | GRLQGGSTLDQQFIKLT YFSTSVEDQNLKRKIQEAWLATQLERRNTKQEILTYYINKVYM   | 180 |
| pbp1a_30190 | GRLQGGSTLDQQFIKLT YFSTSVEDQNLKRKIQEAWLATQLERRNTKQEILTYYINKVYM   | 180 |
| pbp1a_32494 | GRLQGGSTLDQQFIKLT YFSTSVEDQNLKRKIQEAWLATQLERRNTKQEILTYYINKVYM   | 180 |
| pbp1a_P1/7  | GRLQGGSTLDQQFIKLT YFSTSVEDQNLKRKIQEAWLATQLERRNTKQEILTYYINKVYM   | 180 |
| *****       |                                                                 |     |
| pbp1a_32098 | SNGNYGMKTAALAFY GKELKDLTLPQLALLAGMPQAPNQYDPYTNPEDAKVRRDLVLAEM   | 240 |
| pbp1a_33329 | SNGNYGMKTAALAFY GKELKDLTLPQLALLAGMPQAPNQYDPYTNPEDAKVRRDLVLAEM   | 240 |
| pbp1a_22715 | SNGNYGMKTAALAFY GKELKDLTLPQLALLAGMPQAPNQYDPYTNPEDAKARRDLVLAEM   | 240 |
| pbp1a_37647 | SNGNYGMKTAALAFY GKELKDLTLPQLALLAGMPQAPNQYDPYTNPEDAKARRDLVLAEM   | 240 |
| pbp1a_40085 | SNGNYGMKTAALAFY GKELKDLTLPQLALLAGMPQAPNQYDPYTNPEDAKARRDLVLAEM   | 240 |
| pbp1a_40484 | SNGNYGMKTAALAFY GKELKDLTLPQLALLAGMPQAPNQYDPYTNPEDAKARRDLVLAEM   | 240 |
| pbp1a_40747 | SNGNYGMKTAALAFY GKELKDLTLPQLALLAGMPQAPNQYDPYTNPEDAKARRDLVLAEM   | 240 |
| pbp1a_41126 | SNGNYGMKTAALAFY GKELKDLTLPQLALLAGMPQAPNQYDPYTNPEDAKARRDLVLAEM   | 240 |
| pbp1a_30190 | SNGNYGMKTAALAFY GKELKDLTLPQLALLAGMPQAPNQYDPYTNPEDAKARRDLVLAEM   | 240 |
| pbp1a_32494 | SNGNYGMKTAALAFY GKELKDLTLPQLALLAGMPQAPNQYDPYTNPEDAKARRDLVLAEM   | 240 |
| pbp1a_P1/7  | SNGNYGMKTAALAFY GKELKDLTLPQLALLAGMPQAPNQYDPYTNPEDAKARRDLVLAEM   | 240 |
| *****       |                                                                 |     |
| pbp1a_32098 | LEEKYIDNTQYEQAVLT PVT DGLQPLSNAAAYPAYMDNYLKQVVVEEVEEKTGYNLLTTGM | 300 |
| pbp1a_33329 | LEEKYIDNTQYEQAVLT PVT DGLQPLSNAAAYPAYMDNYLKQVVVEEVEEKTGYNLLTTGM | 300 |
| pbp1a_22715 | LEEKYIDNTQYEQAVLT PVT DGLQPLSNAAAYPAYMDNYLKQVVVEEVEEKTGYNLLTTGM | 300 |
| pbp1a_37647 | LEEKYIDNTQYEQAVLT PVT DGLQPLSNAAAYPAYMDNYLKQVVVEEVEEKTGYNLLTTGM | 300 |
| pbp1a_40085 | LEEKYIDNTQYEQAVLT PVT DGLQPLSNAAAYPAYMDNYLKQVVVEEVEEKTGYNLLTTGM | 300 |
| pbp1a_40484 | LEEKYIDNTQYEQAVLT PVT DGLQPLSNAAAYPAYMDNYLKQVVVEEVEEKTGYNLLTTGM | 300 |
| pbp1a_40747 | LEEKYIDNTQYEQAVLT PVT DGLQPLSNAAAYPAYMDNYLKQVVVEEVEEKTGYNLLTTGM | 300 |
| pbp1a_41126 | LEEKYIDNTQYEQAVLT PVT DGLQPLSNAAAYPAYMDNYLKQVVVEEVEEKTGYNLLTTGM | 300 |
| pbp1a_30190 | LEEKYIDNTQYEQAVLT PVT DGLQPLSNAAAYPAYMDNYLKQVVVEEVEEKTGYNLLTTGM | 300 |
| pbp1a_32494 | LEEKYIDNTQYEQAVLT PVT DGLQPLSNAAAYPAYMDNYLKQVVVEEVEEKTGYNLLTTGM | 300 |
| pbp1a_P1/7  | LEEKYIDNTQYEQAVLT PVT DGLQPLSNAAAYPAYMDNYLKQVVVEEVEEKTGYNLLTTGM | 300 |
| *****       |                                                                 |     |

|             |                                                              |     |
|-------------|--------------------------------------------------------------|-----|
| pbp1a_32098 | DVYTNVDPAAQQQLWNIYNTDMYVSYPPDLLQVASTVVDVSNQKVVAQLGGRKQETNVSF | 360 |
| pbp1a_33329 | DVYTNVDPAAQQQLWNIYNTDMYVSYPPDLLQVASTVVDVSNQKVVAQLGGRKQETNVSF | 360 |
| pbp1a_22715 | DVYTNVDPAAQQQLWNIYNTDMYVSYPPDLLQVASTVVDVSNQKVVAQLGGRKQETNVSF | 360 |
| pbp1a_37647 | DVYTNVDPAAQQQLWNIYNTDMYVSYPPDLLQVASTVVDVSNQKVVAQLGGRKQETNVSF | 360 |
| pbp1a_40085 | DVYTNVDPAAQQQLWNIYNTDMYVSYPPDLLQVASTVVDVSNQKVVAQLGGRKQETNVSF | 360 |
| pbp1a_40484 | DVYTNVDPAAQQQLWNIYNTDMYVSYPPDLLQVASTVVDVSNQKVVAQLGGRKQETNVSF | 360 |
| pbp1a_40747 | DVYTNVDPAAQQQLWNIYNTDMYVSYPPDLLQVASTVVDVSNQKVVAQLGGRKQETNVSF | 360 |
| pbp1a_41126 | DVYTNVDPAAQQQLWNIYNTDMYVSYPPDLLQVASTVVDVSNQKVVAQLGGRKQETNVSF | 360 |
| pbp1a_30190 | DVYTNVDPAAQQQLWNIYNTDMYVSYPPDLLQVASTVVDVSNQKVVAQLGGRKQETNVSF | 360 |
| pbp1a_32494 | DVYTNVDPAAQQQLWNIYNTDMYVSYPPDLLQVASTVVDVSNQKVVAQLGGRKQETNVSF | 360 |
| pbp1a_P1/7  | DVYTNVDPAAQQQLWNIYNTDMYVSYPPDLLQVASTVVDVSNQKVVAQLGGRKQETNVSF | 360 |
| *****       |                                                              |     |

|             |                                                               |     |
|-------------|---------------------------------------------------------------|-----|
| pbp1a_32098 | GNISVKTAIQYSRNVTAVKALEATGLENALKFLNSVGIDYDPDIYYSNAISSNTSDTGSQY | 480 |
| pbp1a_33329 | GNISVKTAIQYSRNVTAVKALEATGLENALKFLNSVGIDYDPDIYYSNAISSNTSDTGSQY | 480 |
| pbp1a_22715 | GNISVKTAIQYSRNVTAVKALEATGLANALKFLNSVGINYPDIHYSNAISSNTSDTSSKY  | 480 |
| pbp1a_37647 | GNISVKTAIQYSRNVTAVKALEATGLANALKFLNSVGINYPDIHYSNAISSNTSDTSSKY  | 480 |
| pbp1a_40085 | GNISVKTAIQYSRNVTAVKALEATGLANALKFLNSVGINYPDIHYSNAISSNTSDTSSKY  | 480 |
| pbp1a_40484 | GNISVKTAIQYSRNVTAVKALEATGLANALKFLNSVGINYPDIHYSNAISSNTSDTSSKY  | 480 |
| pbp1a_40747 | GNISVKTAIQYSRNVTAVKALEATGLANALKFLNSVGINYPDIHYSNAISSNTSDTSSKY  | 480 |
| pbp1a_41126 | GNISVKTAIQYSRNVTAVKALEATGLANALKFLNSVGINYPDIHYSNAISSNTSDTSSKY  | 480 |
| pbp1a_30190 | GNISVKTAIQYSRNVTAVKALEATGLENALKFLNSVGINYPDIHYSNAISSNTSDTSSKY  | 480 |
| pbp1a_32494 | GNISVKTAIQYSRNVTAVKALEATGLENALKFLNSVGINYPDIHYSNAISSNTSDTSSKY  | 480 |
| pbp1a_P1/7  | GNISVKTAIQYSRNVTAVKALEATGLENALKFLNSVGINYPDIHYSNAISSNTSDTSSKY  | 480 |
| *****       |                                                               |     |

|             |                                                             |     |
|-------------|-------------------------------------------------------------|-----|
| pbp1a_32098 | AVMSYGYGLDASVSGVPMAGKTGTSNYTDSETDTILAAIPEANYSYMVVPDENFVGYS  | 600 |
| pbp1a_33329 | AVMSYGYGLDASVSGVPMAGKTGTSNYTDSETDTILAAIPEANYSYMVVPDENFVGYS  | 600 |
| pbp1a_22715 | AVMSYGYGLNASVSGVPMAGKTGTSNYTDSETDTILASAIPEANYSYMVVPDENFVGYS | 600 |
| pbp1a_37647 | AVMSYGYGLNASVSGVPMAGKTGTSNYTDSETDTILASAIPEANYSYMVVPDENFVGYS | 600 |
| pbp1a_40085 | AVMSYGYGLNASVSGVPMAGKTGTSNYTDSETDTILASAIPEANYSYMVVPDENFVGYS | 600 |
| pbp1a_40484 | AVMSYGYGLNASVSGVPMAGKTGTSNYTDSETDTILASAIPEANYSYMVVPDENFVGYS | 600 |
| pbp1a_40747 | AVMSYGYGLNASVSGVPMAGKTGTSNYTDSETDTILASAIPEANYSYMVVPDENFVGYS | 600 |
| pbp1a_41126 | AVMSYGYGLNASVSGVPMAGKTGTSNYTDSETDTILASAIPEANYSYMVVPDENFVGYS | 600 |
| pbp1a_30190 | AVMSYGYGLNASVSGVPMAGKTGTSNYTDSETDTILASAIPEANYSYMVVPDENFVGYS | 600 |
| pbp1a_32494 | AVMSYGYGLNASVSGVPMAGKTGTSNYTDSETDTILASAIPEANYSYMVVPDENFVGYS | 600 |
| pbp1a_P1/7  | AVMSYGYGLNASVSGVPMAGKTGTSNYTDSETDTILASAIPEANYSYMVVPDENFVGYS | 600 |

|             |                                                             |     |
|-------------|-------------------------------------------------------------|-----|
| pbp1a_32098 | YAMAVWTGYTNRMTPILDNSMRIATDVYHNMLFMHSDYTATDWEMPSGLVRYGSNYLLR | 660 |
| pbp1a_33329 | YAMAVWTGYTNRMTPILDNSMRIATDVYHNMLFMHSDYTATDWEMPSGLVRYGSNYLLR | 660 |
| pbp1a_22715 | YAMAVWTGYTNRMTPILDNSMRIATDVYHNMLFMHSDYTATDWEMPSGLVRYGSNYLLR | 660 |
| pbp1a_37647 | YAMAVWTGYTNRMTPILDNSMRIATDVYHNMLFMHSDYTATDWEMPSGLVRYGSNYLLR | 660 |
| pbp1a_40085 | YAMAVWTGYTNRMTPILDNSMRIATDVYHNMLFMHSDYTATDWEMPSGLVRYGSNYLLR | 660 |
| pbp1a_40484 | YAMAVWTGYTNRMTPILDNSMRIATDVYHNMLFMHSDYTATDWEMPSGLVRYGSNYLLR | 660 |
| pbp1a_40747 | YAMAVWTGYTNRMTPILDNSMRIATDVYHNMLFMHSDYTATDWEMPSGLVRYGSNYLLR | 660 |
| pbp1a_41126 | YAMAVWTGYTNRMTPILDNSMRIATDVYHNMLFMHSDYTATDWEMPSGLVRYGSNYLLR | 660 |
| pbp1a_30190 | YAMAVWTGYTNRMTPILDNSMRIATDVYHNMLFMHSDYTATDWEMPSGLVRYGSNYLLR | 660 |
| pbp1a_32494 | YAMAVWTGYTNRMTPILDNSMRIATDVYHNMLFMHSDYTATDWEMPSGLVRYGSNYLLR | 660 |
| pbp1a_P1/7  | YAMAVWTGYTNRMTPILDNSMRIATDVYHNMLFMHSDYTATDWEMPSGLVRYGSNYLLR | 660 |
|             | *****                                                       |     |

|             |                                                                |     |
|-------------|----------------------------------------------------------------|-----|
| pbp1a_32098 | GSRSLSNAYNTYTSYSTSSSSSTETSETAEATTTSSSETSSGTSTETATSPTATSSSTETAT | 720 |
| pbp1a_33329 | GSRSLSNAYNTYTSYSTSSSSSTETSETAEATTTSSSETSSGTSTETATSPTATSSSTETAT | 720 |
| pbp1a_22715 | GSRSLSNAYNTYTSBSTSSSSSTETSETAEATTTSSSETSSGTSTETAT-----SSTETAT  | 715 |
| pbp1a_37647 | GSRSLSNAYNTYTSBSTSSSSSTETSETAEATTTSSSETSSGTSTETAT-----SSTETAT  | 715 |
| pbp1a_40085 | GSRSLSNAYNTYTSBSTSSSSSTETSETAEATTTSSSETSSGTSTETAT-----SSTETAT  | 715 |
| pbp1a_40484 | GSRSLSNAYNTYTSBSTSSSSSTETSETAEATTTSSSETSSGTSTETAT-----SSTETAT  | 715 |
| pbp1a_40747 | GSRSLSNAYNTYTSBSTSSSSSTETSETAEATTTSSSETSSGTSTETAT-----SSTETAT  | 715 |
| pbp1a_41126 | GSRSLSNAYNTYTSBSTSSSSSTETSETAEATTTSSSETSSGTSTETAT-----SSTETAT  | 715 |
| pbp1a_30190 | GSRSLSNAYNTYTSBSTSSSSSTETSETTEATTTSSSETSSGTATETAT-----SSTETAT  | 715 |
| pbp1a_32494 | GSRSLSNAYNTYTSBSTSSSSSTETSETTEATTTSSSETSSGTATETAT-----SSTETAT  | 715 |
| pbp1a_P1/7  | GSRSLSNAYNTYTSBSTSSSSSTETSETTEATTTSSSETSSGTATETAT-----SSTETAT  | 715 |
|             | ***** :*****                                                   |     |

|             |               |     |
|-------------|---------------|-----|
| pbp1a_32098 | TGNNPATGQTDGQ | 733 |
| pbp1a_33329 | TGNNPATGQTDGQ | 733 |
| pbp1a_22715 | TGNNPATGQTDGQ | 728 |
| pbp1a_37647 | TGNNPATGQTDGQ | 728 |
| pbp1a_40085 | TGNNPATGQTDGQ | 728 |
| pbp1a_40484 | TGNNPATGQTDGQ | 728 |
| pbp1a_40747 | TGNNPATGQTDGQ | 728 |
| pbp1a_41126 | TGNNPATGQTDGQ | 728 |
| pbp1a_30190 | TGNNPATGQTDGQ | 728 |
| pbp1a_32494 | TGNNPATGQTDGQ | 728 |
| pbp1a_P1/7  | TGNNPATGQTDGQ | 728 |
|             | *****         |     |
