# Supplementary material for: Non-Penicillin-Susceptible Streptococcus suis Isolated from Humans
Source: MDPI journal article supplement (doi:10.3390/pathogens10091178), 2021-09-13
Supplement: s1 [file s1]

**Table S1. Antimicrobial resistance patterns and the resistance genes of *S. suis* by serotypes and sequence types**

| Serotype | ST        | Macrolide and tetracycline resistance genes profile | Antimicrobial resistance pattern | Phenotype | Isolates |
|----------|-----------|-----------------------------------------------------|----------------------------------|-----------|----------|
| 1        | 105 (n=2) | <i>ermB+tetO</i>                                    | ATH+E+T+CD                       | MDR       | 2        |
| 2        | 1 (n=143) | <i>ermB+tetO</i>                                    | ATH+E+T+CD                       | MDR       | 58       |
|          |           |                                                     | ATH+E+T+CD+C                     | MDR       | 32       |
|          |           |                                                     | T                                | -         | 7        |
|          |           |                                                     | E+T+CD                           | MDR       | 4        |
|          |           |                                                     | ATH+T+CD                         | MDR       | 1        |
|          |           |                                                     | T+CD                             | -         | 3        |
|          |           |                                                     | T+C                              | -         | 1        |
|          |           |                                                     | E+CD                             | -         | 1        |
|          |           |                                                     | T+C+CD                           | MDR       | 1        |
|          |           | <i>tetO</i>                                         | T                                | -         | 11       |
|          |           |                                                     | ATH+E+T+CD                       | MDR       | 7        |
|          |           |                                                     | E+T+CD                           | MDR       | 3        |
|          |           |                                                     | ATH+E+T+CD+C                     | MDR       | 1        |
|          |           |                                                     | ATH+T+CD                         | MDR       | 1        |
|          |           |                                                     | T+C+P                            | MDR       | 1        |
|          |           |                                                     | T+CD                             | -         | 4        |
|          |           | <i>ermB+tetO+tetW</i>                               | ATH+E+T+CD                       | MDR       | 3        |
|          |           |                                                     | ATH+E+T+CD+C                     | MDR       | 1        |
|          |           |                                                     | ATH+E+T+CD+P                     | MDR       | 1        |
|          |           | <i>ermB+tetM</i>                                    | T                                | -         | 1        |
|          |           | unknown                                             | E+CD                             | -         | 1        |
|          | 25 (n=22) | <i>ermB+tetO</i>                                    | ATH+E+T+CD+C                     | MDR       | 10       |
|          |           |                                                     | ATH+E+T+CD                       | MDR       | 7        |
|          |           |                                                     | ATH+E+T+CD+C+P                   | MDR       | 1        |
|          |           | <i>ermB+tetO+tetW</i>                               | ATH+E+T+CD+C                     | MDR       | 3        |
|          |           | <i>tetL+tetM</i>                                    | ATH+E+T+CD+LEV                   | MDR       | 1        |
|          | 28 (n=9)  | <i>tetO</i>                                         | ATH+E+T+CD                       | MDR       | 1        |
|          |           | <i>ermB+tetO</i>                                    | ATH+E+T+CD                       | MDR       | 6        |
|          |           |                                                     | E+T+CD                           | MDR       | 2        |
|          | 103 (n=7) | <i>ermB+tetO+tetW</i>                               | ATH+E+T+CD                       | MDR       | 4        |
|          |           | <i>ermB+tetO</i>                                    | ATH+E+T+CD+C                     | MDR       | 2        |
|          |           | <i>ermB</i>                                         | ATH+E+T+CD+C                     | MDR       | 1        |

| Serotype | ST          | Macrolide and tetracycline resistance genes profile | Antimicrobial resistance pattern | Phenotype | Isolates |
|----------|-------------|-----------------------------------------------------|----------------------------------|-----------|----------|
| 2        | 104 (n=111) | <i>ermB+tetO</i>                                    | ATH+E+T+CD                       | MDR       | 57       |
|          |             |                                                     | ATH+E+T+CD+C                     | MDR       | 14       |
|          |             |                                                     | ATH+E+CD                         | -         | 1        |
|          |             |                                                     | ATH+E+T+CD+C+P                   | MDR       | 1        |
|          |             |                                                     | E+T+CD                           | MDR       | 4        |
|          |             |                                                     | T                                | -         | 1        |
|          |             |                                                     | ATH+E+T+CD+P                     | MDR       | 1        |
|          |             | <i>tetO</i>                                         | E+T+CD                           | MDR       | 11       |
|          |             |                                                     | ATH+E+T+CD                       | MDR       | 4        |
|          |             |                                                     | ATH+E+T+CD+C+P                   | MDR       | 1        |
|          |             | <i>ermB+tetO+tetW</i>                               | ATH+E+T+CD+C                     | MDR       | 8        |
|          |             |                                                     | ATH+E+T+CD                       | MDR       | 4        |
|          |             |                                                     | ATH+T                            | -         | 1        |
|          |             | <i>tetO+tetW</i>                                    | ATH+E+T+CD+C                     | MDR       | 1        |
|          |             | <i>ermB</i>                                         | ATH+E+T+CD                       | MDR       | 2        |
|          | 105 (n=5)   | <i>ermB+tetO</i>                                    | ATH+E+T+CD                       | MDR       | 2        |
|          |             |                                                     | ATH+E+T+C+CD                     | MDR       | 2        |
|          |             |                                                     | ATH+E+T+CD+P                     | MDR       | 1        |
|          | 126 (n=3)   | <i>ermB+tetO</i>                                    | E+T+CD                           | MDR       | 2        |
|          |             | <i>tetO</i>                                         | E+T+CD+C                         | MDR       | 1        |
|          | 144 (n=7)   | <i>tetO</i>                                         | E+T+CD                           | MDR       | 2        |
|          |             | <i>ermB+tetO</i>                                    | ATH+E+T+CD                       | MDR       | 4        |
|          |             |                                                     | ATH+E+T+CD+C                     | MDR       | 1        |
|          | 233 (n=33)  | <i>ermB+tetO</i>                                    | ATH+E+T+CD+P                     | MDR       | 14       |
|          |             |                                                     | ATH+E+T+CD                       | MDR       | 9        |
|          |             |                                                     | ATH+E+T+CD+C+P                   | MDR       | 3        |
|          |             |                                                     | ATH+E+T+CD+C                     | MDR       | 2        |
|          |             |                                                     | E+T+CD+P                         | MDR       | 2        |
|          |             |                                                     | ATH+E+CD+P                       | MDR       | 1        |
|          |             |                                                     | ATH+E+CD+C+P                     | MDR       | 1        |
|          |             | <i>tetO</i>                                         | ATH+E+T+CD                       | MDR       | 1        |

| Serotype | ST        | Macrolide and tetracycline resistance genes profile | Antimicrobial resistance pattern | Phenotype | Isolates |
|----------|-----------|-----------------------------------------------------|----------------------------------|-----------|----------|
| 2        | 236 (n=1) | <i>ermB+tetO</i>                                    | ATH+E+T+CD                       | MDR       | 1        |
|          | 298 (n=1) | unknown                                             | E+CD                             | -         | 1        |
|          | 337 (n=5) | <i>ermB+tetO</i>                                    | E+T+CD                           | MDR       | 1        |
|          |           | <i>tetO</i>                                         | E+T+CD                           | MDR       | 2        |
|          |           |                                                     | T+CD                             | -         | 1        |
|          |           |                                                     | ATH+E+T                          | -         | 1        |
|          | 379 (n=3) | <i>ermB+tetO</i>                                    | ATH+E+T+CD+P                     | MDR       | 2        |
|          |           |                                                     | E+T+CD+P                         | MDR       | 1        |
|          | 380 (n=8) | <i>ermB+tetO</i>                                    | ATH+E+T+CD                       | MDR       | 6        |
|          |           |                                                     | ATH+E+T+CD+C                     | MDR       | 1        |
|          |           |                                                     | ATH+E+CD                         | -         | 1        |
|          | 381 (n=4) | <i>ermB+tetO</i>                                    | ATH+E+T+CD+C                     | MDR       | 3        |
|          |           |                                                     | ATH+E+T+CD                       | MDR       | 1        |
|          | 382 (n=2) | <i>ermB+tetO</i>                                    | ATH+E+T+CD+P                     | MDR       | 1        |
|          |           |                                                     | ATH+E+T+CD+C                     | MDR       | 1        |
|          | 391 (n=9) | <i>ermB+tetO</i>                                    | ATH+E+T+CD                       | MDR       | 6        |
|          |           |                                                     | ATH+E+T+CD+C                     | MDR       | 1        |
|          |           |                                                     | E+T+CD                           | MDR       | 1        |
|          |           | <i>ermB</i>                                         | ATH+E+T+CD                       | MDR       | 1        |
|          | 392 (n=4) | <i>ermB+tetO</i>                                    | ATH+E+T+CD                       | MDR       | 2        |
|          |           |                                                     | ATH+E+T+CD+C                     | MDR       | 1        |
|          |           |                                                     | E+T+CD                           | MDR       | 1        |
|          | 393 (n=1) | <i>ermB+tetO</i>                                    | ATH+E+T+CD+C+P                   | MDR       | 1        |
|          | 395 (n=1) | <i>ermB+tetO</i>                                    | ATH+E+T+CD+C                     | MDR       | 1        |
|          | 512 (n=8) | <i>ermB+tetO</i>                                    | ATH+E+T+CD                       | MDR       | 5        |
|          |           |                                                     | E+T+CD                           | MDR       | 2        |
|          |           |                                                     | E+T+CD+C                         | MDR       | 1        |

| Serotype     | ST         | Macrolide and tetracycline resistance genes profile | Antimicrobial resistance pattern | Phenotype | Isolates   |
|--------------|------------|-----------------------------------------------------|----------------------------------|-----------|------------|
| 2            | 513 (n=1)  | <i>ermB+tetO</i>                                    | ATH+E+T+CD                       | MDR       | 1          |
|              | 514 (n=2)  | <i>ermB+tetO</i>                                    | ATH+E+T+CD                       | MDR       | 1          |
|              |            |                                                     | ATH+E+T+CD+C                     | MDR       | 1          |
|              | 515 (n=1)  | <i>ermB</i>                                         | ATH+E+T+CD                       | MDR       | 1          |
|              | 516 (n=1)  | <i>ermB+tetO</i>                                    | ATH+E+T+CD+C+LEV                 | MDR       | 1          |
| 4            | 94 (n=1)   | <i>ermB+tetO</i>                                    | ATH+E+T+CD+C                     | MDR       | 1          |
| 5            | 235 (n=1)  | <i>ermB+tetO</i>                                    | ATH+E+T+CD+C+P                   | MDR       | 1          |
|              | 221 (n=1)  | <i>ermB+tetO</i>                                    | ATH+E+T+CD+C                     | MDR       | 1          |
| 9            | 16 (n=1)   | <i>tetW</i>                                         | ATH+E+T+CD                       | MDR       | 1          |
| 14           | 11 (n=2)   | <i>tetO</i>                                         | E+T+CD                           | MDR       | 1          |
|              |            | unknown                                             | T+CD                             | -         | 1          |
|              | 105 (n=44) | <i>ermB+tetO</i>                                    | ATH+E+T+CD                       | MDR       | 27         |
|              |            |                                                     | ATH+E+T+C+CD                     | MDR       | 11         |
|              |            |                                                     | ATH+E+T+C+CD+P                   | MDR       | 1          |
|              |            |                                                     | ATH+E+CD                         | -         | 1          |
|              |            | <i>ermB</i>                                         | ATH+E+T+CD                       | MDR       | 1          |
|              |            | <i>tetO</i>                                         | ATH+E+T+CD                       | MDR       | 2          |
|              |            | <i>tetL+tetM</i>                                    | ATH+E+T+CD                       | MDR       | 1          |
| 24           | 237 (n=1)  | <i>ermB+tetO</i>                                    | ATH+E+T+CD+C                     | MDR       | 1          |
|              | 221 (n=2)  | <i>ermB+tetO</i>                                    | ATH+E+T+CD                       | MDR       | 1          |
|              |            |                                                     | ATH+E+T+CD+C+P                   | MDR       | 1          |
|              | 234 (n=1)  | <i>ermB+tetO</i>                                    | ATH+E+T+CD+P                     | MDR       | 1          |
| <b>Total</b> |            |                                                     |                                  |           | <b>448</b> |

Abbreviations; Cefepime; CPM, ceftriaxone; CRO, levofloxacin; LEV, chloramphenicol; C, tetracycline; T, azithromycin; ATH, clindamycin; C, erythromycin; E and penicillin; P
